# Supplementary material for: What Makes a Bacterial Species Pathogenic?:Comparative Genomic Analysis of the Genus Leptospira
Source: PLoS Negl Trop Dis. 2016 Feb 18;10(2):e0004403. doi: 10.1371/journal.pntd.0004403 (PMC4758666; doi:10.1371/journal.pntd.0004403)
Supplement: S8 Table — (XLSX) [file pntd.0004403.s015.xlsx]

## Sheet: ordered
S8 Table. Leptospiral Proteins Involved in Adhesion to Extracellular Matrix (ECM), Plasminogen (PLG)-Binding and Complement Evasion
				# genomes within cluster	L. interrogans sv. Copenhageni str. Fiocruz L1-130	L. kirschneri sv. Cynopteri str. 3522 CT	L. noguchii sv. Panama str. CZ 214T	L. alstoni sv. Pingchang str. 80-412	L. weilii sv. undetermined str. LNT 1234	L. alexanderi sv. Manhao str. 3 L 60T	L. borgpetersenii sv. Javanica str. UI 09931	L. santarosai sv. Shermani str. 1342KT	L. kmetyi sv. Malaysia str. Bejo-Iso9T	L. fainei sv. Hurstbridge str. BUT 6T	L. broomii sv. Hurstbridge str. 5399T	L. wolffii sv. Khorat str. Khorat-H2T	L. licerasiae sv. Varillal str. VAR 010	L. inadai sv. Lyme str. 10T	L. wolbachii sv. Codice str. CDC	L. yanagawae sv. Saopaulo str. Sao Paulo	L. biflexa sv. Patoc str. Patoc1	L. vanthielii sv. Holland str. Waz Holland	L. terpstrae sv. Hualin str. LT 11-33T	L. meyeri sv. Hardjo str. Went 5
Gene locus (Protein name)	Accession	Ligands*	Groups		P	P	P	P	P	P	P	P	P	I	I	I	I	I	S	S	S	S	S	S	Reference (First author, et al; journal; year, PMID)
LIC_10054 (MPL36)	AAS68691.1	PLG	P+I+S	20	+	+	+	+	+	+	+	+	+	+	+	+	+	+	+	+	+	+	+	+	Vieira et al. PLoS One. 2010 Jun 22;5(6):e11259.PubMed PMID: 20582320
LIC_10314 (Lsa63)	AAS68941.1	ECM	P+I+S	20	+	+	+	+	+	+	+	+	+	+	+	+	+	+	+	+	+	+	+	+	Vieira et al., J Infect. 2010 Jan;60(1):52-64.PubMed PMID: 19879894.
LIC_10788 (FlaA-1)	AAS69404.1	PLG	P+I+S	20	+	+	+	+	+	+	+	+	+	+	+	+	+	+	+	+	+	+	+	+	Vieira et al., 2012
LIC_10973 (OmpL1)	AAS69584.1	ECM, PLG	P+I+S	20	+	+	+	+	+	+	+	+	+	+	+	+	+	+	+	+	+	+	+	+	Fernandes et al.,Infect Immun. 2012 80(10):3679-92. PubMed PMID: 22802342.
LIC_11194 (citrate lyase)	AAS69801.1	PLG	P+I+S	20	+	+	+	+	+	+	+	+	+	+	+	+	+	+	+	+	+	+	+	+	Vieira et al., 2012
LIC_11436 (Mfn7)	AAS70035.1	ECM	P+I+S	20	+	+	+	+	+	+	+	+	+	+	+	+	+	+	+	+	+	+	+	+	Pinne et al., J Bacteriol. 2012 Nov;194(22):6074-87. PubMed PMID: 22961849.
LIC_11469 (Lsa20)	AAS70067.1	ECM, PLG	P+I+S	20	+	+	+	+	+	+	+	+	+	+	+	+	+	+	+	+	+	+	+	+	Mendes et al., Infect Immun. 2011 Nov;79(11):4657-67. PMID: 21844229
LIC_11947 (LepA)	AAS70529.1	C4BP	P+I+S	20	+	+	+	+	+	+	+	+	+	+	+	+	+	+	+	+	+	+	+	+	Barbosa et al 2010
LIC_11954 (enolase)	AAS70536.1	PLG	P+I+S	20	+	+	+	+	+	+	+	+	+	+	+	+	+	+	+	+	+	+	+	+	Nogueira et al.,PLoS One. 2013 Oct 18;8(10):e78150.PubMed PMID: 24205133
LIC_11975 (Lsa36)	AAS70551.1	ECM, PLG	P+I+S	20	+	+	+	+	+	+	+	+	+	+	+	+	+	+	+	+	+	+	+	+	Siqueira et al., Am J Trop Med Hyg. 2013 Dec;89(6):1103-16. PubMed PMID: 23958908;
LIC_12238 (rLIC_12238)	AAS70810.1	PLG	P+I+S	20	+	+	+	+	+	+	+	+	+	+	+	+	+	+	+	+	+	+	+	+	Vieira et al. PLoS One. 2010 Jun 22;5(6):e11259.PubMed PMID: 20582320
LIC_12263 (OmpL37)	AAS70835.1	ECM	P+I+S	20	+	+	+	+	+	+	+	+	+	+	+	+	+	+	+	+	+	+	+	+	Pinne et al., PLoS Negl Trop Dis. 2010 Sep 7;4(9):e815. PubMed PMID: 20844573.
LIC_12407 (Glutamine synthetase)	AAS70976.1	PLG	P+I+S	20	+	+	+	+	+	+	+	+	+	+	+	+	+	+	+	+	+	+	+	+	Vieira et al., 2012
LIC_12730 (rLIC_12730)	AAS71287.1	PLG	P+I+S	20	+	+	+	+	+	+	+	+	+	+	+	+	+	+	+	+	+	+	+	+	Vieira et al. PLoS One. 2010 Jun 22;5(6):e11259.PubMed PMID: 20582320
LIC_12795 (Acetyl-CoA acetyltransferase)	AAS71349.1	PLG	P+I+S	20	+	+	+	+	+	+	+	+	+	+	+	+	+	+	+	+	+	+	+	+	Vieira et al., 2012
LIC_12875 (Ef Tu)	AAS71428.1	ECM, PLG, FH	P+I+S	20	+	+	+	+	+	+	+	+	+	+	+	+	+	+	+	+	+	+	+	+	Vieira et al. PLoS One. 2010 Jun 22;5(6):e11259.PubMed PMID: 20582320; Wolff et al., PLoS One. 2013 Nov 27;8(11):e81818.PMID: 2431236
LIC_12906 (LfhA/Lsa24/LenA)	AAS71459.1	ECM, PLG, FH, FHL-1	P+I+S	20	+	+	+	+	+	+	+	+	+	+	+	+	+	+	+	+	+	+	+	+	Barbosa et al., Infect Immun. 2006 ;74(11):6356-64. PubMed PMID: 16954400; Stevenson et al., PLoS One. 2007;2(11):e1188. PMID: 18000555; Verma et al Infect Immun. 2006;74(5):2659-66. PubMed PMID: 16622202; Verma et al., Infect Immun. 2010 ;78(5):2053-9, PubMed PMID: 20160016
LIC_12976 (rLIC_12976)	AAS71526.1	ECM	P+I+S	20	+	+	+	+	+	+	+	+	+	+	+	+	+	+	+	+	+	+	+	+	Lima et al., Biochem Biophys Res Commun. 2013 Feb 8;431(2):342-7. PubMed PMID: 23291183.
LIC_13050 (OmpL47)	AAS71599.1	ECM	P+I+S	20	+	+	+	+	+	+	+	+	+	+	+	+	+	+	+	+	+	+	+	+	Pinne et al., PLoS Negl Trop Dis. 2010 Sep 7;4(9):e815. PubMed PMID: 20844573.
LIC_13143 (TlyC)	AAS71688.1	ECM	P+I+S	20	+	+	+	+	+	+	+	+	+	+	+	+	+	+	+	+	+	+	+	+	Carvalho et al., FEBS Lett. 2009 Apr 17;583(8):1381-5. PubMed PMID: 19328790.
LIC_10537 (Mfn9)	AAS69158.1	ECM	P+I+S	19	+	+	+	+	+	+	+	−	+	+	+	+	+	+	+	+	+	+	+	+	Pinne et al., J Bacteriol. 2012 Nov;194(22):6074-87. PubMed PMID: 22961849.
LIC_12253 (Lsa25)	AAS70825.1	ECM, C4BP	P+I+S	19	+	+	+	+	+	+	+	+	+	+	+	+	−	+	+	+	+	+	+	+	Domingos et al., BMC Microbiol. 2012 Mar 30;12:50. PubMed PMID: 22463075
LIC_10714 (Mfn2)	AAS69335.1	ECM	P+I+S	18	+	+	+	+	+	+	+	+	+	+	+	+	+	+	+	−	−	+	+	+	Pinne et al., J Bacteriol. 2012 Nov;194(22):6074-87. PubMed PMID: 22961849.
LIC_10524 (DnaK)	AAS69145.1	PLG	P+I+S	17	+	+	+	+	+	+	+	+	+	+	+	+	+	+	+	+	+	−	−	−	Vieira et al., 2012
LIC_12315 (LenD)	AAS70886.1	ECM	P+I+S	11	+	+	−	−	+	+	+	−	+	−	−	+	−	−	+	+	+	−	−	+	Stevenson et al., PLoS One. 2007 Nov 14;2(11):e1188. PMID: 18000555
LIC_12690 (Lp95)	AAS71248.1	ECM	P+I+S	9	+	+	+	−	+	−	−	−	+	−	−	−	+	−	+	+	−	−	+	−	Atzingen et al.,J Infect. 2009 Oct;59(4):264-76. PubMed PMID: 19665803.
LIC_13248 (LenF)	AAS71792.1	ECM	P+S	13	+	+	+	+	+	+	+	+	+	−	−	−	−	−	+	−	−	+	+	+	Stevenson et al., PLoS One. 2007 Nov 14;2(11):e1188. PMID: 18000555
LIC_13467 (LenE)	AAS72006.1	ECM	P+S	9	+	+	+	−	+	+	−	+	−	−	−	−	−	−	−	−	−	+	+	+	Stevenson et al., PLoS One. 2007 Nov 14;2(11):e1188. PMID: 18000555
LIC_13006 (LenC)	AAS71556.1	ECM	P+S	8	+	+	+	+	−	−	−	−	+	−	−	−	−	−	+	−	−	+	+	−	Stevenson et al., PLoS One. 2007 Nov 14;2(11):e1188. PMID: 18000555
LIC_10997 (LenB)	AAS69608.1	ECM	P+S	2	+	−	−	−	−	−	−	−	−	−	−	−	−	−	−	−	−	−	−	+	Stevenson et al., PLoS One. 2007 Nov 14;2(11):e1188. PMID: 18000555
LIC_10258 (Lsa66)	AAS68886.1	ECM, PLG	P+I	14	+	+	+	+	+	+	+	+	+	+	+	+	+	+	−	−	−	−	−	−	Oliveira et al., PLoS One. 2011;6(7):e21962. PubMed PMID: 21755014; Pinne et al.,J Bacteriol. 2012 Nov;194(22):6074-87. PubMed PMID:22961849;
LIC_10731 (Lsa45)	AAS69350.1	ECM, PLG	P+I	14	+	+	+	+	+	+	+	+	+	+	+	+	+	+	−	−	−	−	−	−	Fernandes et al., Microbiology. 2014 Jan;160(Pt 1):149-64. PubMed PMID: 24162609.
LIC_11009 (Lsa26)	AAS69619.1	ECM, PLG	P+I	14	+	+	+	+	+	+	+	+	+	+	+	+	+	+	−	−	−	−	−	−	Siqueira et al., Am J Trop Med Hyg. 2013 Dec;89(6):1103-16. PubMed PMID: 23958908;
LIC_11352 (LipL32)	AAS69953.1	ECM, PLG	P+I	14	+	+	+	+	+	+	+	+	+	+	+	+	+	+	−	−	−	−	−	−	Hoke et al., Infect Immun. 2008 May;76(5):2063-9. PubMed PMID: 18285490; Hauk et al., Infect Immun. 2008 Jun;76(6):2642-50.PubMed PMID: 18391007; Murray et al., Infect Immun.2009 Mar;77(3):952-8.PubMed PMID:19103763; Chaemchuen et al., Vet Microbiol. 2011 Nov 21;153(1-2):178-85.PubMed PMID: 21592685;Vieira et al. PLoS One. 2010 Jun 22;5(6):e11259.PubMed PMID: 20582320
LIC_11360 (Lsa23)	AAS69961.1	ECM, C4BP, FH, PLG	P+I	14	+	+	+	+	+	+	+	+	+	+	+	+	+	+	−	−	−	−	−	−	Siqueira et al., Am J Trop Med Hyg. 2013 Dec;89(6):1103-16. PubMed PMID: 23958908;
LIC_11612 (Mfn1)	AAS70207.1	ECM	P+I	14	+	+	+	+	+	+	+	+	+	+	+	+	+	+	−	−	−	−	−	−	Pinne et al., J Bacteriol. 2012 Nov;194(22):6074-87. PubMed PMID: 22961849.
LIC_11834 (Lsa33)	AAS70420.1	ECM, PLG, C4BP	P+I	14	+	+	+	+	+	+	+	+	+	+	+	+	+	+	−	−	−	−	−	−	Domingos et al., BMC Microbiol. 2012 Mar 30;12:50. PubMed PMID: 22463075
LIC_12816 (Conserved hyptothetical protein)	AAS71370.1	PLG	P+I	14	+	+	+	+	+	+	+	+	+	+	+	+	+	+	−	−	−	−	−	−	Vieira et al., 2012
LIC_10091 (LipL40)	AAS68725.1	PLG	P+I	12	+	+	+	+	+	+	+	+	+	+	+	−	−	+	−	−	−	−	−	−	Vieira et al. PLoS One. 2010 Jun 22;5(6):e11259.PubMed PMID: 20582320
LIC_12892 (Lp29)	AAS71445.1	PLG	P+I	9	+	−	−	+	+	−	+	−	+	+	+	+	−	+	−	−	−	−	−	−	Vieira et al. PLoS One. 2010 Jun 22;5(6):e11259.PubMed PMID: 20582320
LIC_10494 (rLIC_10494)	AAS69115.1	PLG	P+I	7	+	+	+	−	−	+	−	−	−	+	+	−	−	+	−	−	−	−	−	−	Vieira et al. PLoS One. 2010 Jun 22;5(6):e11259.PubMed PMID: 20582320
LIC_10793 (Lp49)	AAS69409.1	PLG	P	9	+	+	+	+	+	+	+	+	+	−	−	−	−	−	−	−	−	−	−	−	Vieira et al. PLoS One. 2010 Jun 22;5(6):e11259.PubMed PMID: 20582320
LIC_11087 (Lsa30)	AAS69694.1	ECM, PLG, C4BP	P	9	+	+	+	+	+	+	+	+	+	−	−	−	−	−	−	−	−	−	−	−	Souza et al., Microb Pathog. 2012 Sep;53(3-4):125-34. PubMed PMID: 22732096.
LIC_12880 (Lp30)	AAS71433.1	PLG	P	8	+	+	+	+	+	+	+	+	−	−	−	−	−	−	−	−	−	−	−	−	Oliveira et al., PLoS One. 2011;6(7):e21962. PubMed PMID: 21755014; Pinne et al.,J Bacteriol. 2012 Nov;194(22):6074-87. PubMed PMID:22961849;
LIC_10645 (Lsa44)	AAS69266.1	ECM, PLG	P	7	+	+	+	+	−	+	+	+	−	−	−	−	−	−	−	−	−	−	−	−	Fernandes et al., Microbiology. 2014 Jan;160(Pt 1):149-64. PubMed PMID: 24162609.
LIC_11051 (Mfn6)	AAS69658.1	ECM	P	5	+	+	+	+	−	−	+	−	−	−	−	−	−	−	−	−	−	−	−	−	Pinne et al., J Bacteriol. 2012 Nov;194(22):6074-87. PubMed PMID: 22961849.
LIC_12099 (LipL53)	AAS70670.1	ECM	P	4	+	+	+	+	−	−	−	−	−	−	−	−	−	−	−	−	−	−	−	−	Oliveira et al., Microbes Infect. 2010 Mar;12(3):207-17. PubMed PMID: 20026283.
LIC_10368 (Lsa21)	AAS68992.1	ECM	P	2	+	−	+	−	−	−	−	−	−	−	−	−	−	−	−	−	−	−	−	−	Atzingen et al., BMC Microbiol. 2008 29;8:70. doi: 10.1186/1471-2180-8-70. PubMed PMID: 18445272
LIC_12895 (Lsa27)	AAS71448.1	ECM	P	1	+	−	−	−	−	−	−	−	−	−	−	−	−	−	−	−	−	−	−	−	Longhi et al., J Med Microbiol. 2009 Oct;58(Pt 10):1275-82. PubMed PMID: 19541787.
P = Pathogenic species; I = Intermediate species; S = Saprophytic species
*ECM = extracellular matrix; PLG = plasminogen; FH = factor H; FLH-1 = factor H-like; C4BP = C4 binding protein

## Sheet: Table5_clusters.txt
				L. meyeri Hardjo Went 5	L. inadai Lyme 10T	L. santarosai serovar Shermani str. 1342KT	L. kirschneri Cynopteri 3522 CT	L. broomii undetermined 5399T	L. kmetyi undetermined Bejo-Iso9T	L. fainei Hurstbridge BUT 6T	L. noguchii Panama CZ 214T	L. wolffii undetermined Khorat-H2T	L. alexanderi Manhao 3 L 60T	L. weilii serovar Ranarum str. ICFT	L. borgpetersenii Javanica UI 09931	L. licerasiae Varillal VAR 010	L. alstoni serovar Pingchang str. 80-412	L. wolbachii serovar Codice str. CDC	L. vanthielii serovar Holland str. Waz Holland	L. yanagawae serovar Saopaulo str. Sao Paulo	L. terpstrae serovar Hualin str. LT 11-33T	L. biflexa Patoc Patoc1	L. interrogans Copenhageni str. Fiocruz L1-130	Leptonema illini DSM 21528
				S	I	P	P	I	P	I	P	I	P	P	P	I	P	S	S	S	S	S	P	O
		cluster_id	protein name	gls454017	gls454047	gls454048	gls454049	gls454050	gls454052	gls454058	gls454059	gls454061	gls454062	gls454086	gls454103	gls454185	gls454193	gls454195	gls454199	gls454202	gls454203	ntlb05	ntli03	ntli09
NT03LI3326	LIC_12906 (LfhA/Lsa24/LenA)	3187	PF07588 family protein	LEP1GSC017_2497	LEP1GSC047_1787	LEP1GSC048_0039	LEP1GSC049_3285	LEP1GSC050_3025	LEP1GSC052_4211	LEP1GSC058_3042	LEP1GSC059_1231	LEP1GSC061_4147	LEP1GSC062_4501	LEP1GSC086_0481	LEP1GSC103_1951	LEP1GSC185_0609	LEP1GSC193_2809	LEP1GSC195_2537	LEP1GSC199_4127	LEP1GSC202_1900	LEP1GSC203_2519	NT05LB0803	NT03LI3326	NT09LI2547
NT03LI1147	LIC_10997 (LenB)	1082	conserved hypothetical protein	LEP1GSC017_1944																			NT03LI1147
NT03LI3448	LIC_13006 (LenC)	3299	PF07588 family protein				LEP1GSC049_1285		LEP1GSC052_3203		LEP1GSC059_4564						LEP1GSC193_1264	LEP1GSC195_2895	LEP1GSC199_3762		LEP1GSC203_2873		NT03LI3448
NT03LI2633	LIC_12315 (LenD)	2519	conserved hypothetical protein	LEP1GSC017_1879			LEP1GSC049_1776		LEP1GSC052_1540			LEP1GSC061_1577	LEP1GSC062_3499	LEP1GSC086_1091	LEP1GSC103_3833			LEP1GSC195_3177		LEP1GSC202_1234		NT05LB0127	NT03LI2633	NT09LI3037
NT03LI3964	LIC_13467 (LenE)	3798	conserved hypothetical protein	LEP1GSC017_0201		LEP1GSC048_0332	LEP1GSC049_2741				LEP1GSC059_3801		LEP1GSC062_3505	LEP1GSC086_1716					LEP1GSC199_1511		LEP1GSC203_0774		NT03LI3964	NT09LI0697
NT03LI3722	LIC_13248 (LenF)	3561	PF07588 family protein	LEP1GSC017_0744		LEP1GSC048_0254	LEP1GSC049_4001		LEP1GSC052_3951		LEP1GSC059_4205		LEP1GSC062_2494	LEP1GSC086_2158	LEP1GSC103_1704		LEP1GSC193_3284	LEP1GSC195_0250	LEP1GSC199_1485		LEP1GSC203_0802		NT03LI3722
NT03LI1692	LIC_11469 (Lsa20)	1605	conserved hypothetical protein	LEP1GSC017_1098	LEP1GSC047_4299	LEP1GSC048_1162	LEP1GSC049_0895	LEP1GSC050_1633	LEP1GSC052_1509	LEP1GSC058_2052	LEP1GSC059_3486	LEP1GSC061_1660	LEP1GSC062_0903	LEP1GSC086_1148	LEP1GSC103_3658	LEP1GSC185_3288	LEP1GSC193_2266	LEP1GSC195_0636	LEP1GSC199_0139	LEP1GSC202_2829	LEP1GSC203_0729	NT05LB2876	NT03LI1692
NT03LI0407	LIC_10368 (Lsa21)	388	conserved hypothetical protein								LEP1GSC059_4353												NT03LI0407
NT03LI1572	LIC_11360 (Lsa23)	1491	conserved hypothetical protein		LEP1GSC047_2595	LEP1GSC048_3857	LEP1GSC049_1009	LEP1GSC050_0964	LEP1GSC052_0847	LEP1GSC058_0713	LEP1GSC059_3596	LEP1GSC061_0344	LEP1GSC062_3411	LEP1GSC086_2742	LEP1GSC103_3713	LEP1GSC185_2639	LEP1GSC193_0601						NT03LI1572
NT03LI2563	LIC_12253 (Lsa25)	2449	PF07603 family protein	LEP1GSC017_2267	LEP1GSC047_4045	LEP1GSC048_3799	LEP1GSC049_1840	LEP1GSC050_2048	LEP1GSC052_1740	LEP1GSC058_1731	LEP1GSC059_1783	LEP1GSC061_1379	LEP1GSC062_3378	LEP1GSC086_4080	LEP1GSC103_1306		LEP1GSC193_4395	LEP1GSC195_2774	LEP1GSC199_3885	LEP1GSC202_1669	LEP1GSC203_2746	NT05LB0573	NT03LI2563
NT03LI1160	LIC_11009 (Lsa26)	1094	conserved hypothetical protein		LEP1GSC047_3159	LEP1GSC048_0566	LEP1GSC049_0715	LEP1GSC050_2357	LEP1GSC052_0509	LEP1GSC058_2415	LEP1GSC059_2635	LEP1GSC061_0794	LEP1GSC062_0658	LEP1GSC086_1606	LEP1GSC103_0994	LEP1GSC185_0332	LEP1GSC193_0041						NT03LI1160	NT09LI0806
NT03LI3316	LIC_12895 (Lsa27)	3177	conserved hypothetical protein																				NT03LI3316
NT03LI1256	LIC_11087 (Lsa30)	1185	conserved hypothetical protein			LEP1GSC048_0762	LEP1GSC049_4304		LEP1GSC052_0702		LEP1GSC059_1497		LEP1GSC062_1098	LEP1GSC086_1477	LEP1GSC103_3998		LEP1GSC193_0461						NT03LI1256
NT03LI2095	LIC_11834 (Lsa33)	1992	sigma factor regulatory protein, FecR/PupR family		LEP1GSC047_0684	LEP1GSC048_0969	LEP1GSC049_2391	LEP1GSC050_1485	LEP1GSC052_1381	LEP1GSC058_2201	LEP1GSC059_2145	LEP1GSC061_1822	LEP1GSC062_3627	LEP1GSC086_0302	LEP1GSC103_3510	LEP1GSC185_3144	LEP1GSC193_2155						NT03LI2095
NT03LI2246	LIC_11975 (Lsa36)	2141	conserved hypothetical protein	LEP1GSC017_0538	LEP1GSC047_2520	LEP1GSC048_1149	LEP1GSC049_2110	LEP1GSC050_1040	LEP1GSC052_1487	LEP1GSC058_0637	LEP1GSC059_1987	LEP1GSC061_0428	LEP1GSC062_0919	LEP1GSC086_1164	LEP1GSC103_3640	LEP1GSC185_2730	LEP1GSC193_2246	LEP1GSC195_0050	LEP1GSC199_0521	LEP1GSC202_2409	LEP1GSC203_1008	NT05LB2351	NT03LI2246
NT03LI0733	LIC_10645 (Lsa44)	694	conserved hypothetical protein			LEP1GSC048_1802	LEP1GSC049_1389				LEP1GSC059_4638		LEP1GSC062_3813		LEP1GSC103_2851		LEP1GSC193_1249						NT03LI0733
NT03LI0837	LIC_10731 (Lsa45)	791	beta-lactamase		LEP1GSC047_3618	LEP1GSC048_1760	LEP1GSC049_1481	LEP1GSC050_2654	LEP1GSC052_2903	LEP1GSC058_2704	LEP1GSC059_1317	LEP1GSC061_3495	LEP1GSC062_2733	LEP1GSC086_3367	LEP1GSC103_3073	LEP1GSC185_1908	LEP1GSC193_3937						NT03LI0837
NT03LI0353	LIC_10314 (Lsa63)	337	conserved hypothetical protein	LEP1GSC017_0599	LEP1GSC047_1171	LEP1GSC048_2472	LEP1GSC049_3580	LEP1GSC050_3624	LEP1GSC052_3310	LEP1GSC058_3637	LEP1GSC059_4301	LEP1GSC061_2563	LEP1GSC062_3861	LEP1GSC086_2947	LEP1GSC103_2180	LEP1GSC185_1560	LEP1GSC193_1098	LEP1GSC195_0111	LEP1GSC199_0457	LEP1GSC202_2466	LEP1GSC203_0949	NT05LB2416	NT03LI0353	NT09LI0019
NT03LI0284	LIC_10258 (Lsa66)	273	OmpA family protein		LEP1GSC047_1920	LEP1GSC048_2537	LEP1GSC049_3651	LEP1GSC050_2884	LEP1GSC052_3114	LEP1GSC058_2908	LEP1GSC059_4114	LEP1GSC061_3315	LEP1GSC062_2100	LEP1GSC086_3261	LEP1GSC103_0130	LEP1GSC185_1758	LEP1GSC193_1339						NT03LI0284
NT03LI3073	LIC_12690 (Lp95)	2949	PF07588 family protein				LEP1GSC049_1642		LEP1GSC052_2509		LEP1GSC059_2442			LEP1GSC086_0645		LEP1GSC185_0759		LEP1GSC195_2720		LEP1GSC202_1547	LEP1GSC203_2699		NT03LI3073
NT03LI3602	LIC_13143 (TlyC)	3445	conserved hypothetical protein	LEP1GSC017_2426	LEP1GSC047_1762	LEP1GSC048_2514	LEP1GSC049_4114	LEP1GSC050_3044	LEP1GSC052_3924	LEP1GSC058_3058	LEP1GSC059_0460	LEP1GSC061_3157	LEP1GSC062_0581	LEP1GSC086_0932	LEP1GSC103_2971	LEP1GSC185_0988	LEP1GSC193_1186	LEP1GSC195_2606	LEP1GSC199_4051	LEP1GSC202_1834	LEP1GSC203_2587	NT05LB0735	NT03LI3602
NT03LI1561	LIC_11352 (LipL32)	1480	conserved hypothetical protein		LEP1GSC047_2601	LEP1GSC048_1467	LEP1GSC049_1019	LEP1GSC050_0958	LEP1GSC052_0836	LEP1GSC058_0719	LEP1GSC059_3606	LEP1GSC061_0338	LEP1GSC062_3399	LEP1GSC086_2752	LEP1GSC103_3725	LEP1GSC185_2633	LEP1GSC193_0589						NT03LI1561
NT03LI2385	LIC_12099 (LipL53)	2274	beta-propeller repeat protein				LEP1GSC049_1992				LEP1GSC059_1951						LEP1GSC193_4225						NT03LI2385
NT03LI1111	LIC_10973 (OmpL1)	1049	conserved hypothetical protein	LEP1GSC017_2532	LEP1GSC047_3471	LEP1GSC048_0462	LEP1GSC049_4234	LEP1GSC050_2514	LEP1GSC052_3457	LEP1GSC058_2565	LEP1GSC059_2599	LEP1GSC061_4219	LEP1GSC062_1661	LEP1GSC086_3492	LEP1GSC103_3205	LEP1GSC185_0559	LEP1GSC193_3790	LEP1GSC195_2503	LEP1GSC199_4161	LEP1GSC202_1933	LEP1GSC203_2486	NT05LB0835	NT03LI1111	NT09LI0318
NT03LI2574	LIC_12263 (OmpL37)	2460	conserved hypothetical protein	LEP1GSC017_2747	LEP1GSC047_2954	LEP1GSC048_3234	LEP1GSC049_1830	LEP1GSC050_0624	LEP1GSC052_0695	LEP1GSC058_4100	LEP1GSC059_1774	LEP1GSC061_1246	LEP1GSC062_0860	LEP1GSC086_4256	LEP1GSC103_1166	LEP1GSC185_2399	LEP1GSC193_1460	LEP1GSC195_2284	LEP1GSC199_0865	LEP1GSC202_2160	LEP1GSC203_2276	NT05LB1050	NT03LI2574
NT03LI3490	LIC_13050 (OmpL47)	3340	bacterial group 3 Ig-like protein	LEP1GSC017_0955	LEP1GSC047_3376	LEP1GSC048_1556	LEP1GSC049_1234	LEP1GSC050_1155	LEP1GSC052_4274	LEP1GSC058_0519	LEP1GSC059_4483	LEP1GSC061_3307	LEP1GSC062_2197	LEP1GSC086_4537	LEP1GSC103_0029	LEP1GSC185_0809	LEP1GSC193_1243	LEP1GSC195_0501	LEP1GSC199_0273	LEP1GSC202_2686	LEP1GSC203_0585	NT05LB2733	NT03LI3490
NT03LI1849	LIC_11612 (Mfn1)	1757	conserved hypothetical protein		LEP1GSC047_3902	LEP1GSC048_3010	LEP1GSC049_2486	LEP1GSC050_1215	LEP1GSC052_1142	LEP1GSC058_0460	LEP1GSC059_0599	LEP1GSC061_2075	LEP1GSC062_2912	LEP1GSC086_3821	LEP1GSC103_1733	LEP1GSC185_2895	LEP1GSC193_1899						NT03LI1849
NT03LI0816	LIC_10714 (Mfn2)	771	TonB-dependent receptor	LEP1GSC017_2959	LEP1GSC047_3997	LEP1GSC048_3462	LEP1GSC049_1462	LEP1GSC050_2096	LEP1GSC052_2955	LEP1GSC058_1777	LEP1GSC059_1295	LEP1GSC061_0158	LEP1GSC062_0065	LEP1GSC086_1761	LEP1GSC103_2095	LEP1GSC185_0100	LEP1GSC193_3584	LEP1GSC195_2083	LEP1GSC199_2592		LEP1GSC203_2066		NT03LI0816
NT03LI1213	LIC_11051 (Mfn6)	1143	leucine rich repeat protein				LEP1GSC049_0070				LEP1GSC059_1445				LEP1GSC103_3938		LEP1GSC193_2700						NT03LI1213
NT03LI1657	LIC_11436 (Mfn7)	1575	sigma factor regulatory protein, FecR/PupR family	LEP1GSC017_3593	LEP1GSC047_4331	LEP1GSC048_1501	LEP1GSC049_0924	LEP1GSC050_1600	LEP1GSC052_0928	LEP1GSC058_2084	LEP1GSC059_3514	LEP1GSC061_1697	LEP1GSC062_1250	LEP1GSC086_2794	LEP1GSC103_3764	LEP1GSC185_3255	LEP1GSC193_0686	LEP1GSC195_1298	LEP1GSC199_1998	LEP1GSC202_3154	LEP1GSC203_1447	NT05LB1877	NT03LI1657
NT03LI0602	LIC_10537 (Mfn9)	573	OmpA family protein	LEP1GSC017_0949	LEP1GSC047_1966		LEP1GSC049_3409	LEP1GSC050_2765	LEP1GSC052_4080	LEP1GSC058_2859	LEP1GSC059_0258	LEP1GSC061_1062	LEP1GSC062_4034	LEP1GSC086_2238	LEP1GSC103_2334	LEP1GSC185_1690	LEP1GSC193_3138	LEP1GSC195_0495	LEP1GSC199_0279	LEP1GSC202_2680	LEP1GSC203_0579	NT05LB2727	NT03LI0602
NT03LI3412	LIC_12976 (rLIC_12976)	3265	NAD(P)-binding Rossmann-like domain protein	LEP1GSC017_2565	LEP1GSC047_1014	LEP1GSC048_0488	LEP1GSC049_3359	LEP1GSC050_3768	LEP1GSC052_4172	LEP1GSC058_3787	LEP1GSC059_0215	LEP1GSC061_1061	LEP1GSC062_1695	LEP1GSC086_3534	LEP1GSC103_3248	LEP1GSC185_1689	LEP1GSC193_3055	LEP1GSC195_2469	LEP1GSC199_4195	LEP1GSC202_1970	LEP1GSC203_2453	NT05LB0869	NT03LI3412
NT03LI3230	LIC_12816 (Hyptothetical protein)	3094	conserved hypothetical protein		LEP1GSC047_3147	LEP1GSC048_1176	LEP1GSC049_2842	LEP1GSC050_2345	LEP1GSC052_2129	LEP1GSC058_2407	LEP1GSC059_0796	LEP1GSC061_0771	LEP1GSC062_0419	LEP1GSC086_0667	LEP1GSC103_1535	LEP1GSC185_0313	LEP1GSC193_2968						NT03LI3230
NT03LI1374	LIC_11194 (citrate lyase)	1300	HpcH/HpaI aldolase/citrate lyase family protein	LEP1GSC017_0672	LEP1GSC047_4105	LEP1GSC048_0811	LEP1GSC049_1697	LEP1GSC050_1987	LEP1GSC052_0758	LEP1GSC058_1831	LEP1GSC059_1592	LEP1GSC061_1450	LEP1GSC062_1157	LEP1GSC086_1402	LEP1GSC103_3926	LEP1GSC185_0003	LEP1GSC193_0518	LEP1GSC195_0179	LEP1GSC199_1407	LEP1GSC202_2544	LEP1GSC203_0878	NT05LB2490	NT03LI1374	NT09LI0405
NT03LI0899	LIC_10788 (FlaA-1)	851	flagellar filament outer layer protein Flaa	LEP1GSC017_0570	LEP1GSC047_2417	LEP1GSC048_0352	LEP1GSC049_1533	LEP1GSC050_2210	LEP1GSC052_1991	LEP1GSC058_1247	LEP1GSC059_1377	LEP1GSC061_0670	LEP1GSC062_1820	LEP1GSC086_0745	LEP1GSC103_0475	LEP1GSC185_0216	LEP1GSC193_3434	LEP1GSC195_0082	LEP1GSC199_0486	LEP1GSC202_2440	LEP1GSC203_0977	NT05LB2385	NT03LI0899	NT09LI3891
NT03LI3205	LIC_12795 (Acetyl-CoA acetyltransferase)	3069	acetyl-CoA C-acetyltransferase	LEP1GSC017_2414	LEP1GSC047_3719	LEP1GSC048_1783	LEP1GSC049_2817	LEP1GSC050_3932	LEP1GSC052_4212	LEP1GSC058_3949	LEP1GSC059_3145	LEP1GSC061_4053	LEP1GSC062_1643	LEP1GSC086_3470	LEP1GSC103_3177	LEP1GSC185_0689	LEP1GSC193_3675	LEP1GSC195_2618	LEP1GSC199_4043	LEP1GSC202_1823	LEP1GSC203_2602	NT05LB0725	NT03LI3205	NT09LI0352
NT03LI2744	LIC_12407 (Glutamine synthetase)	2629	glutamine synthetase, type I	LEP1GSC017_3153	LEP1GSC047_2755	LEP1GSC048_0866	LEP1GSC049_0308	LEP1GSC050_0831	LEP1GSC052_0623	LEP1GSC058_1498	LEP1GSC059_2743	LEP1GSC061_0235	LEP1GSC062_1221	LEP1GSC086_1662	LEP1GSC103_1231	LEP1GSC185_2538	LEP1GSC193_1470	LEP1GSC195_1888	LEP1GSC199_2402	LEP1GSC202_3697	LEP1GSC203_1878	NT05LB1452	NT03LI2744	NT09LI2524
NT03LI0590	LIC_10524 (DnaK)	561	chaperone protein DnaK	LEP1GSC017_1658	LEP1GSC047_1799	LEP1GSC048_2809	LEP1GSC049_3416	LEP1GSC050_3013	LEP1GSC052_4013	LEP1GSC058_3031	LEP1GSC059_0284	LEP1GSC061_2527	LEP1GSC062_4203	LEP1GSC086_0876	LEP1GSC103_3015	LEP1GSC185_1597	LEP1GSC193_3508	LEP1GSC195_3404	LEP1GSC199_3205	LEP1GSC202_1027
NT03LI3313	LIC_12892 (Lp29)	3175	putative lipoprotein		LEP1GSC047_2341			LEP1GSC050_2282	LEP1GSC052_2078	LEP1GSC058_1319		LEP1GSC061_3873		LEP1GSC086_1013	LEP1GSC103_1031		LEP1GSC193_4076						NT03LI3313
NT03LI3297	LIC_12880 (Lp30)	3159	conserved hypothetical protein			LEP1GSC048_1232	LEP1GSC049_3259				LEP1GSC059_1351		LEP1GSC062_1877	LEP1GSC086_1758	LEP1GSC103_1558		LEP1GSC193_2988						NT03LI3297
NT03LI0906	LIC_10793 (Lp49)	858	lactonase, 7-bladed beta-propeller domain protein			LEP1GSC048_2642	LEP1GSC049_1542		LEP1GSC052_2313		LEP1GSC059_1386		LEP1GSC062_4109	LEP1GSC086_3204	LEP1GSC103_0300		LEP1GSC193_3743						NT03LI0906
NT03LI0100	LIC_10091 (LipL40)	96	conserved hypothetical protein		LEP1GSC047_1577	LEP1GSC048_2184	LEP1GSC049_2612	LEP1GSC050_3225	LEP1GSC052_3657	LEP1GSC058_3237	LEP1GSC059_3933		LEP1GSC062_2257	LEP1GSC086_2358	LEP1GSC103_2600		LEP1GSC193_2560						NT03LI0100
NT03LI0058	LIC_10054 (MPL36)	55	sporulation and cell division repeat protein	LEP1GSC017_1511	LEP1GSC047_1460	LEP1GSC048_2144	LEP1GSC049_2652	LEP1GSC050_3343	LEP1GSC052_3615	LEP1GSC058_3353	LEP1GSC059_3891	LEP1GSC061_2885	LEP1GSC062_2299	LEP1GSC086_2396	LEP1GSC103_2559	LEP1GSC185_1255	LEP1GSC193_2500	LEP1GSC195_3545	LEP1GSC199_3059	LEP1GSC202_0890	LEP1GSC203_3512	NT05LB3316	NT03LI0058	NT09LI0668
NT03LI0554	LIC_10494 (rLIC_10494)	526	conserved hypothetical protein		LEP1GSC047_3764		LEP1GSC049_3440	LEP1GSC050_1788		LEP1GSC058_2854	LEP1GSC059_0341		LEP1GSC062_4249										NT03LI0554
NT03LI3124	LIC_12730 (rLIC_12730)	2994	NHL repeat protein	LEP1GSC017_3572	LEP1GSC047_2073	LEP1GSC048_1194	LEP1GSC049_1576	LEP1GSC050_4091	LEP1GSC052_2664	LEP1GSC058_0087	LEP1GSC059_2397	LEP1GSC061_0933	LEP1GSC062_1060	LEP1GSC086_1513	LEP1GSC103_0891	LEP1GSC185_0454	LEP1GSC193_2688	LEP1GSC195_1318	LEP1GSC199_1977	LEP1GSC202_3135	LEP1GSC203_1467	NT05LB1856	NT03LI3124
NT03LI2546	LIC_12238 (rLIC_12238)	2433	conserved hypothetical protein	LEP1GSC017_2197	LEP1GSC047_4059	LEP1GSC048_3785	LEP1GSC049_1854	LEP1GSC050_2033	LEP1GSC052_1726	LEP1GSC058_1717	LEP1GSC059_1798	LEP1GSC061_1391	LEP1GSC062_3394	LEP1GSC086_4063	LEP1GSC103_1321	LEP1GSC185_0046	LEP1GSC193_4378	LEP1GSC195_2847	LEP1GSC199_3813	LEP1GSC202_1596	LEP1GSC203_2819	NT05LB0501	NT03LI2546
NT03LI2224	LIC_11954 (enolase)	2120	phosphopyruvate hydratase	LEP1GSC017_3466	LEP1GSC047_4377	LEP1GSC048_1128	LEP1GSC049_2134	LEP1GSC050_1552	LEP1GSC052_0983	LEP1GSC058_2133	LEP1GSC059_2012	LEP1GSC061_1746	LEP1GSC062_0938	LEP1GSC086_1183	LEP1GSC103_3624	LEP1GSC185_3212	LEP1GSC193_2226	LEP1GSC195_1550	LEP1GSC199_1865	LEP1GSC202_3028	LEP1GSC203_1571	NT05LB1753	NT03LI2224	NT09LI1727
NT03LI3290	LIC_12875 (Ef Tu)	3152	translation elongation factor Tu	LEP1GSC017_3772	LEP1GSC047_3571	LEP1GSC048_1614	LEP1GSC049_3251	LEP1GSC050_2615	LEP1GSC052_2875	LEP1GSC058_2663	LEP1GSC059_2476	LEP1GSC061_3550	LEP1GSC062_2161	LEP1GSC086_3294	LEP1GSC103_0069	LEP1GSC185_1962	LEP1GSC193_0890	LEP1GSC195_1155	LEP1GSC199_2140	LEP1GSC202_3295	LEP1GSC203_1305	NT05LB2017	NT03LI3290	NT09LI3823
NT03LI2217	LIC_11947 (LepA)	2113	putative lipoprotein	LEP1GSC017_3473	LEP1GSC047_4371	LEP1GSC048_1122	LEP1GSC049_2140	LEP1GSC050_1558	LEP1GSC052_0977	LEP1GSC058_2127	LEP1GSC059_2018	LEP1GSC061_1740	LEP1GSC062_0944	LEP1GSC086_1189	LEP1GSC103_3618	LEP1GSC185_3218	LEP1GSC193_2220	LEP1GSC195_1543	LEP1GSC199_1872	LEP1GSC202_3035	LEP1GSC203_1564	NT05LB1760	NT03LI2217
	LIC_12906 (LfhA/Lsa24/LenA)			+	+	+	+	+	+	+	+	+	+	+	+	+	+	+	+	+	+	+	+	+
	LIC_10997 (LenB)			+	−	−	−	−	−	−	−	−	−	−	−	−	−	−	−	−	−	−	+	−
	LIC_13006 (LenC)			−	−	−	+	−	+	−	+	−	−	−	−	−	+	+	+	−	+	−	+	−
	LIC_12315 (LenD)			+	−	−	+	−	+	−	−	+	+	+	+	−	−	+	−	+	−	+	+	+
	LIC_13467 (LenE)			+	−	+	+	−	−	−	+	−	+	+	−	−	−	−	+	−	+	−	+	+
	LIC_13248 (LenF)			+	−	+	+	−	+	−	+	−	+	+	+	−	+	+	+	−	+	−	+	−
	LIC_11469 (Lsa20)			+	+	+	+	+	+	+	+	+	+	+	+	+	+	+	+	+	+	+	+	−
	LIC_10368 (Lsa21)			−	−	−	−	−	−	−	+	−	−	−	−	−	−	−	−	−	−	−	+	−
	LIC_11360 (Lsa23)			−	+	+	+	+	+	+	+	+	+	+	+	+	+	−	−	−	−	−	+	−
	LIC_12253 (Lsa25)			+	+	+	+	+	+	+	+	+	+	+	+	−	+	+	+	+	+	+	+	−
	LIC_11009 (Lsa26)			−	+	+	+	+	+	+	+	+	+	+	+	+	+	−	−	−	−	−	+	+
	LIC_12895 (Lsa27)			−	−	−	−	−	−	−	−	−	−	−	−	−	−	−	−	−	−	−	+	−
	LIC_11087 (Lsa30)			−	−	+	+	−	+	−	+	−	+	+	+	−	+	−	−	−	−	−	+	−
	LIC_11834 (Lsa33)			−	+	+	+	+	+	+	+	+	+	+	+	+	+	−	−	−	−	−	+	−
	LIC_11975 (Lsa36)			+	+	+	+	+	+	+	+	+	+	+	+	+	+	+	+	+	+	+	+	−
	LIC_10645 (Lsa44)			−	−	+	+	−	−	−	+	−	+	−	+	−	+	−	−	−	−	−	+	−
	LIC_10731 (Lsa45)			−	+	+	+	+	+	+	+	+	+	+	+	+	+	−	−	−	−	−	+	−
	LIC_10314 (Lsa63)			+	+	+	+	+	+	+	+	+	+	+	+	+	+	+	+	+	+	+	+	+
	LIC_10258 (Lsa66)			−	+	+	+	+	+	+	+	+	+	+	+	+	+	−	−	−	−	−	+	−
	LIC_12690 (Lp95)			−	−	−	+	−	+	−	+	−	−	+	−	+	−	+	−	+	+	−	+	−
	LIC_13143 (TlyC)			+	+	+	+	+	+	+	+	+	+	+	+	+	+	+	+	+	+	+	+	−
	LIC_11352 (LipL32)			−	+	+	+	+	+	+	+	+	+	+	+	+	+	−	−	−	−	−	+	−
	LIC_12099 (LipL53)			−	−	−	+	−	−	−	+	−	−	−	−	−	+	−	−	−	−	−	+	−
	LIC_10973 (OmpL1)			+	+	+	+	+	+	+	+	+	+	+	+	+	+	+	+	+	+	+	+	+
	LIC_12263 (OmpL37)			+	+	+	+	+	+	+	+	+	+	+	+	+	+	+	+	+	+	+	+	−
	LIC_13050 (OmpL47)			+	+	+	+	+	+	+	+	+	+	+	+	+	+	+	+	+	+	+	+	−
	LIC_11612 (Mfn1)			−	+	+	+	+	+	+	+	+	+	+	+	+	+	−	−	−	−	−	+	−
	LIC_10714 (Mfn2)			+	+	+	+	+	+	+	+	+	+	+	+	+	+	+	+	−	+	−	+	−
	LIC_11051 (Mfn6)			−	−	−	+	−	−	−	+	−	−	−	+	−	+	−	−	−	−	−	+	−
	LIC_11436 (Mfn7)			+	+	+	+	+	+	+	+	+	+	+	+	+	+	+	+	+	+	+	+	−
	LIC_10537 (Mfn9)			+	+	−	+	+	+	+	+	+	+	+	+	+	+	+	+	+	+	+	+	−
	LIC_12976 (rLIC_12976)			+	+	+	+	+	+	+	+	+	+	+	+	+	+	+	+	+	+	+	+	−
	LIC_12816 (Hyptothetical protein)			−	+	+	+	+	+	+	+	+	+	+	+	+	+	−	−	−	−	−	+	−
	LIC_11194 (citrate lyase)			+	+	+	+	+	+	+	+	+	+	+	+	+	+	+	+	+	+	+	+	+
	LIC_10788 (FlaA-1)			+	+	+	+	+	+	+	+	+	+	+	+	+	+	+	+	+	+	+	+	+
	LIC_12795 (Acetyl-CoA acetyltransferase)			+	+	+	+	+	+	+	+	+	+	+	+	+	+	+	+	+	+	+	+	+
	LIC_12407 (Glutamine synthetase)			+	+	+	+	+	+	+	+	+	+	+	+	+	+	+	+	+	+	+	+	+
	LIC_10524 (DnaK)			+	+	+	+	+	+	+	+	+	+	+	+	+	+	+	+	+	−	−	−	−
	LIC_12892 (Lp29)			−	+	−	−	+	+	+	−	+	−	+	+	−	+	−	−	−	−	−	+	−
	LIC_12880 (Lp30)			−	−	+	+	−	−	−	+	−	+	+	+	−	+	−	−	−	−	−	+	−
	LIC_10793 (Lp49)			−	−	+	+	−	+	−	+	−	+	+	+	−	+	−	−	−	−	−	+	−
	LIC_10091 (LipL40)			−	+	+	+	+	+	+	+	−	+	+	+	−	+	−	−	−	−	−	+	−
	LIC_10054 (MPL36)			+	+	+	+	+	+	+	+	+	+	+	+	+	+	+	+	+	+	+	+	+
	LIC_10494 (rLIC_10494)			−	+	−	+	+	−	+	+	−	+	−	−	−	−	−	−	−	−	−	+	−
	LIC_12730 (rLIC_12730)			+	+	+	+	+	+	+	+	+	+	+	+	+	+	+	+	+	+	+	+	−
	LIC_12238 (rLIC_12238)			+	+	+	+	+	+	+	+	+	+	+	+	+	+	+	+	+	+	+	+	−
	LIC_11954 (enolase)			+	+	+	+	+	+	+	+	+	+	+	+	+	+	+	+	+	+	+	+	+
	LIC_12875 (Ef Tu)			+	+	+	+	+	+	+	+	+	+	+	+	+	+	+	+	+	+	+	+	+
	LIC_11947 (LepA)			+	+	+	+	+	+	+	+	+	+	+	+	+	+	+	+	+	+	+	+	−
