# Supplementary material for: What Makes a Bacterial Species Pathogenic?:Comparative Genomic Analysis of the Genus Leptospira
Source: PLoS Negl Trop Dis. 2016 Feb 18;10(2):e0004403. doi: 10.1371/journal.pntd.0004403 (PMC4758666; doi:10.1371/journal.pntd.0004403)
Supplement: S11 Table — (XLSX) [file pntd.0004403.s018.xlsx]

## Sheet: Sheet1
S11 Table. Comparison of Leptospiral Proteins Involved in Motility and Chemotaxis
			Average (SD)
LIC ORFs	Gene	Annotation	Pathogenic	Intermediate	Saprophyte
BASAL BODY
LIC10297	fliE	Flagellar hook-basal body complex protein	94.44 (3.43)	76 (0)	62 (0.63)
LIC10298	flgC	Flagellar basal-body rod protein	97.77 (1.30)	91.4 (0.89)	88.83 (0.40)
LIC10299	flgB	Flagellar basal-body rod protein	96.11 (2.89)	81.2 (1.64)	71 (0)
LIC10621	flbD	Flagellar protein	94.55 (3.28)	80 (2.44)	57.33 (1.63)
LIC10622	motA	Chemotaxis protein	97.33 (1.65)	85.6 (1.67)	67.16 (0.40)
LIC12931	motA1	Chemotaxis protein	94.77 (3.38)	73.2 (2.04)	58 (0.63)
LIC10623	motB	Chemotaxis protein	97.55 (1.58)	82.8 (0.83)	72.33 (0.51)
LIC11713	motB2	Motility protein B	91 (4.76)	71.4 (0.89)	54 (0.63)
LIC10624	fliL	Flagellar protein	97.44 (1.81)	75 (0)	63.83 (0.40)
LIC11187	flgD	Flagellar hook assembly scaffolding protein	79 (10.2)	61 (7.44)	63.83 (1.16)
LIC11324	flgG	Flagellar basal-body rod protein	99.22 (0.44)	96.2 (0.83)	87 (0)
LIC11325	flgA	Chaperone P-ring formation protein	83 (8.94)	42.8 (1.30)	22.66 (1.36)
LIC11326	flgH	Flagellar L-ring protein	83.77 (5.86)	63.2 (0.83)	45 (1.67)
LIC11327	flgI	Flagellar P-ring protein - hook-associated	92.66 (5.26)	69.2 (1.09)	44.5 (0.54)
LIC11370	fliN	Flagellar motor switch protein/C ring	95.22 (3.30)	74 (0.70)	55.66 (0.51)
LIC11371	fliO	Flagellar protein Type III secretion	78.55 (10.3)	48.6 (1.14)	34.16 (1.32)
LIC11372	fliP	Flagellar protein biosynthesis	95.44 (2.45)	84.2 (2.68)	72.5 (3.20)
LIC11373	fliQ	Flagellar protein	96 (3.24)	80 (1.22)	74.66 (0.51)
LIC11374	fliR	Flagellar protein	96.55 (1.66)	75.6 (0.89)	54.83 (0.75)
LIC11376	flhA	Flagellar protein	97.33 (1.58)	74.6 (1.51)	60.83 (0.75)
LIC11377	flhF	Flagellar biosynthesis regulator	90.88 (5.75)	63.2 (0.44)	50.83 (0.40)
LIC11380	fliA	RNA polymerase sigma factor	99.22 (0.44)	92.4 (0.54)	88 (0.63)
LIC11389	flbB	Flagellar protein	94.11 (3.33)	71.8 (0.83)	62 (0)
LIC11390	fliJ	Chaperone-like protein export apparatus	86.55 (7.12)	39 (1.22)	32.5 (0.54)
LIC11391	fliI	Flagellum-specific ATP synthase/ATPase	97.11 (1.45)	81.6 (1.34)	63.5 (0.54)
LIC11392	fliF	Flagellar M-ring protein	97.88 (1.26)	86.6 (0.89)	78.83 (0.40)
LIC11394	fliH	Flagellar assembly protein/ATPase complex	99.22 (0.66)	91.8 (0.44)	86.83 (0.40)
LIC11836	fliM	Flagellar motor switch protein/C ring	99.33 (0.5)	93 (0)	88.66 (0.51)
LIC11846	fliN	Flagellar motor switch protein	79.22 (7.17)	58.4 (3.20)	56 (2.44)
LIC10023	fliG	Flagellar motor switch protein/C ring	98.66 (1)	97.4 (0.54)	93.66 (0.51)
LIC11393	fliG1	Flagellar motor switch protein/C ring	93.66 (3.42)	57.6 (1.51)	42 (2.52)
LIC11900	fliG3	Flagellar motor switch protein/C ring	93.88 (2.52)	67.6 (0.89)	55.5 (0.54)
LIC11071	flgM	Anti sigma factor for FliA	95.11 (3.17)	69.8 (2.16)	55.16 (0.98)
LIC11375	flhB	Export apparatus	96.44 (2.55)	70.8 (1.48)	56.16 (0.75)
LIC13452	flgN	Chaperone export apparatus	90.33 (4.89)	52 (0.70)	44.66 (0.51)
LIC13449	fliW	Flagellar assembly factor	91.55 (4.39)	72.8 (0.44)	54.16 (0.75)
LIC11562	flhX	FlhB-like protein Type III secretion	85 (9.51)	50 (5.04)	35.33 (2.50)
TOTAL			93.13 (6.01)	73.02 (14.8)	60.91 (17.3)
HOOK
LIC13450	flgL	Flagellar hook-associated protein	98.66 (0.70)	90 (0.70)	81.66 (0.51)
LIC13451	flgK	Flagellar hook-associated protein	96.77 (1.20)	85.6 (0.54)	70 (0)
LIC12035	flhO	Hook protein/FliG	96.66 (1.80)	88.4 (0.89)	77.33 (0.51)
LIC11188	flgE	Flagellar hook protein	97.55 (1.42)	89.8 (0.83)	81 (0)
LIC10723	fliD	Filament cap	91.44 (4.87)	63 (0)	45 (0)
LIC11186	fliK	Flagellar hook-length control protein	69.66 (16.2)	24.6 (0.89)	23.16 (1.94)
LIC11328	flgJ	Peptidoglycan hydrolase/rod cap	84 (8.88)	72.6 (0.89)	53.66 (1.03)
TOTAL			90.68 (10.5)	73.42 (23.8)	61.69 (22.0)
FILAMENT
LIC10788	flaA	Flagellar filament outer layer protein A	93.33 (4.41)	76.6 (0.54)	54.66 (1.21)
LIC10787	flaA2	Flagellar filament outer layer protein A	98.66 (1.11)	81.6 (1.14)	70.16 (0.40)
LIC11531	flaB	Flagellar filament core protein FlaB	99 (0)	96.4 (0.54)	91 (0)
LIC11890	flaB2	Flagellar filament core protein FlaB	99.11 (0.33)	95.6 (0.54)	86.66 (1.03)
LIC11889	flaB3	Flagellar filament core protein FlaB	99 (0)	91 (0.70)	78.66 (0.51)
LIC11532	flaB4	Flagellar filament core protein FlaB	99.22 (0.44)	82.2 (1.78)	63.66 (1.21)
LIC11657	fliS	Flagellar protein (modular protein)	97 (3.12)	81.4 (1.14)	62.33 (0.51)
TOTAL			97.90 (2.15)	86.4 (7.82)	72.45 (13.4)
CHEMOTAXIS
LIC10685	mcp	Methyl-accepting chemotaxis protein	88.66 (7.71)	NA	NA
LIC11216	mcp	Methyl-accepting chemotaxis protein	90.88 (6.17)	63.6 (1.14)	34.16 (0.40)
LIC11407	mcp	Methyl-accepting chemotaxis protein	79.44 (12.7)	51 (5.33)	42.33 (2.65)
LIC11488	cheX	Chemotaxis protein	97.77 (1.78)	85.6 (1.51)	66 (1.26)
LIC11520	cheB3	Chemotaxis response regulator protein	90.55 (4.55)	41.6 (11.5)	62.16 (0.98)
LIC11521	cheD1	Chemoreceptor glutamine deamidase	88.11 (4.48)	47.6 (8.87)	55.33 (6.77)
LIC11522	cheW	Chemotaxis protein	91.44 (5.41)	39.2 (13.0)	53.83 (0.75)
LIC11523	mcp	Chemotaxis protein	86.22 (7.29)	42.4 (22.1)	49.5 (13.9)
LIC11524	cheA2	Chemotaxis protein histidine kinase	83.11 (8.96)	31 (9.51)	35.66 (3.98)
LIC11525	-	Anti sigma factor antagonist	69.66 (17.0)	20.2 (1.30)	23.33 (2.87)
LIC11526	cheY	Chemotaxis response regulator	96.88 (2.20)	43.2 (16.9)	69.33 (0.51)
LIC11691	mcp-2	Methyl-acceptingchemotaxis protein	78.11 (23.6)	41 (18.3)	40 (0.89)
LIC11871	cheR	Chemotaxis protein methyltransferase	94.88 (3.10)	77.2 (0.44)	61.83 (0.40)
LIC12061	cheB2	Chemotaxis protein-glutamate methylesterase	79.11 (18.6)	29.6 (1.81)	30.83 (1.32)
LIC12062	cheR1	Chemotaxis protein	78.33 (30.0)	NA	NA
LIC12240	cheW2	Chemotaxis protein	92.66 (3.93)	83.6 (4.66)	54.5 (18.9)
LIC12455	cheB1	Chemotaxis response regulator protein	92.33 (4.76)	68.6 (0.89)	55 (0.89)
LIC12456	cheA	Chemotaxis protein	90.55 (4.71)	66.8 (0.83)	57 (1.09)
LIC12457	cheW1	Chemotaxis protein	93.33 (5.09)	65.4 (1.67)	58.33 (1.36)
LIC12482	mcp	Methyl-acceptingchemotaxis I	90.11 (6.82)	65 (5.14)	41.66 (0.81)
LIC12500	mcpB	Chemoreceptor transmembrane protein	91.77 (5.69)	55.2 (4.86)	43.33 (1.36)
LIC12921	mcpA	Methyl-acceptingchemotaxis protein	86.66 (9.05)	59.8 (3.34)	50.5 (0.54)
LIC13183	mcp	Methyl-accepting chemotaxis-like	96.33 (2.39)	71 (1.58)	70.5 (0.54)
LIC13394	dmcA	Methyl-accepting chemotaxis protein	60.11 (45.3)	39.4 (22.1)	NA
LIC13401	mcp	Methyl-accepting chemotaxis protein	88.11 (7.23)	34.4 (8.14)	40.33 (0.81)
TOTAL			87.00 (8.83)	48.89 (22.6)	43.82 (20.4)
NA, not applicable due to lack of ortholog.
