# Supplementary material for: What Makes a Bacterial Species Pathogenic?:Comparative Genomic Analysis of the Genus Leptospira
Source: PLoS Negl Trop Dis. 2016 Feb 18;10(2):e0004403. doi: 10.1371/journal.pntd.0004403 (PMC4758666; doi:10.1371/journal.pntd.0004403)
Supplement: S12 Table — (XLSX) [file pntd.0004403.s019.xlsx]

## Sheet: Summary
S12 Table. Sigma Factors and Accessory Proteins Involved in Gene Regulation in Leptospira
			L. interrogans sv. Copenhageni str. Fiocruz L1-130	L. kirschneri sv. Cynopteri str. 3522 CT	L. noguchii sv. Panama str. CZ 214T	L. alstoni sv. Pingchang str. 80-412	L. weilii sv. undetermined str. LNT 1234	L. alexanderi sv. Manhao str. 3 L 60T	L. borgpetersenii sv. Javanica str. UI 09931	L. santarosai sv. Shermani str. 1342KT	L. kmetyi sv. Malaysia str. Bejo-Iso9T	L. fainei sv. Hurstbridge str. BUT 6T	L. broomii sv. Hurstbridge str. 5399T	L. wolffii sv. Khorat str. Khorat-H2T	L. licerasiae sv. Varillal str. VAR 010	L. inadai sv. Lyme str. 10T	L. wolbachii sv. Codice str. CDC	L. yanagawae sv. Saopaulo str. Sao Paulo	L. biflexa sv. Patoc str. Patoc1	L. vanthielii sv. Holland str. Waz Holland	L. terpstrae sv. Hualin str. LT 11-33T	L. meyeri sv. Hardjo str. Went 5
Protein name	GenBank Accession	Function	P	P	P	P	P	P	P	P	P	I	I	I	I	I	S	S	S	S	S	S
Sigma factors
LIC11701 (RpoD)	AAS70290.1	sigma 70	+	+	+	+	+	+	+	+	+	+	+	+	+	+	+	+	+	+	+	+
LIC11380 (FliA, sigma F)	AAS69981.1	sigma F	+	+	+	+	+	+	+	+	+	+	+	+	+	+	+	+	+	+	+	+
LIC11545 (RpoN)	AAS70141.1	sigma N	+	+	+	+	+	+	+	+	+	+	+	+	+	+	+	+	+	+	+	+
EBPs
LIC10132 (EBP-A)	AAS68765.1	enhancer-binding protein	+	+	+	+	+	+	+	+	+	+	+	+	+	+	+	+	+	+	+	+
LIC11549 (EBP-B)	AAS70145.1	enhancer-binding protein	+	+	+	+	+	+	+	+	+	+	+	+	+	+	+	−	−	−	−	−
ECFs
LIC12490	AAS71055.1	group ECF43	+	+	+	+	+	+	+	+	+	+	+	+	+	+	+	+	+	+	+	+
LIC11817	AAS70405.1	unclassified group	+	+	+	+	−	−	−	+	+	+	+	+	+	+	−	−	−	−	−	−
LIC10144	AAS68777.1	group ECF31	+	+	+	+	+	+	+	+	+	+	+	+	+	−	+	+	−	+	+	+
LIC10386	AAS69009.1	unclassified group	+	+	+	+	+	+	+	+	−	+	+	+	+	+	−	−	−	−	−	−
LIC12757	AAS71314.1	unclassified group	+	+	+	+	+	+	+	+	+	+	+	+	+	+	−	−	−	−	−	−
LIC10225	AAS68853.1	unclassified group	+	+	+	+	+	+	+	+	+	+	+	+	+	+	−	−	−	−	−	−
LIC10559	AAS69180.1	unclassified group	+	−	+	+	−	+	+	+	+	−	−	−	−	−	−	−	−	−	−	−
LIC13266	AAS71810.1	unclassified group	+	+	+	+	+	+	+	+	+	+	+	+	+	+	−	−	−	−	−	−
LIC13285	AAS71829.1	unclassified group	+	+	+	+	+	+	+	+	+	+	+	+	+	+	−	−	−	−	−	−
LEPBI_I1070	ABZ97193.1	group ECF41	−	−	−	−	−	−	−	−	+	+	+	+	+	−	−	−	+	+	+	+
LEPBI_I1238	ABZ97351.1	group ECF42	−	−	−	−	−	−	−	−	−	−	−	−	−	−	+	+	+	+	+	+
LEPBI_I2109	ABZ98211.1	unclassified group	−	−	−	−	−	−	−	−	+	+	+	+	+	+	+	+	+	+	+	+
LEPBI_II0053	ABZ99591.1|	unclassified group	−	−	−	−	−	−	−	−	−	−	−	−	−	−	+	+	+	+	+	+
Anti-ECF sigma factors and anti-sigma factor regulators
LEP1GSC185_1363	EIE02915.1	Serine phosphatase RsbU, regulator of sigma subunit	−	−	−	−	−	−	−	−	+	+	+	+	+	+	−	−	−	−	−	−
LEP1GSC185_2992	EIE01750.1	STAS_anti-anti-sigma_factors	−	−	−	−	−	−	−	−	−	−	−	−	+	−	−	−	−	−	−	−
LEP1GSC185_2622	EID99927.1	Sulphate Transporter and Anti-Sigma factor antagonist	−	−	−	−	−	−	−	−	−	+	+	+	+	+	−	−	−	−	−	−
LEPBI_I3230	ABZ99295.1	Serine phosphatase RsbU, regulator of sigma subunit	−	−	−	−	−	−	−	−	−	−	−	−	−	−	+	+	+	+	+	+
LEPBI_I2292	ABZ98387.1	anti-anti-sigma_factors	−	−	−	−	−	−	−	−	−	−	−	−	−	−	+	+	+	+	+	+
LEPBI_I2282	ABZ98377.1	anti-anti-sigma regulatory factor	−	−	−	−	−	−	−	−	−	−	−	−	−	−	+	+	+	+	+	+
LEPBI_I1743	ABZ97849.1	putative sigma factor sigB regulation protein RsbU	−	−	−	−	−	−	−	−	−	−	−	−	−	−	+	+	+	+	+	+
LEPBI_I1741	ABZ97847.1	anti-sigma factor antagonist	−	−	−	−	−	−	−	−	−	−	−	−	−	−	+	+	+	+	+	+
LEPBI_I1713	ABZ97819.1	anti-sigma factor antagonist	−	−	−	−	−	−	−	−	−	−	−	−	−	−	+	+	+	+	+	+
LEPBI_I1584	ABZ97691.1	anti-sigma factor antagonist	−	−	−	−	−	−	−	−	−	−	−	−	−	−	+	+	+	+	+	+
LEPBI_I1576	ABZ97683.1	anti-sigma factor antagonist	−	−	−	−	−	−	−	−	−	−	−	−	−	−	+	+	+	+	+	+
LEPBI_I1575	ABZ97682.1	putative phosphodiesterase or phosphatase	−	−	+	−	−	−	−	−	−	−	−	−	−	−	+	+	+	+	+	+
LEPBI_I1405	ABZ97514.1	anti-anti-sigma_factors	−	−	−	−	−	−	−	−	−	−	−	−	−	−	+	+	+	+	+	+
LEPBI_I1321	ABZ97431.1	anti-sigma factor antagonist	−	−	−	−	−	−	−	−	−	−	−	−	−	−	+	+	+	+	−	+
LEPBI_I1036	ABZ97159.1	anti-sigma regulatory factor	−	−	−	−	−	−	−	−	−	−	−	−	−	−	+	+	+	+	+	+
LEPBI_I0926	ABZ97050.1	anti-sigma factors	−	−	−	−	−	−	−	−	−	−	−	−	−	−	+	+	+	+	+	+
LEPBI_I0904	ABZ97029.1	anti-sigma regulatory factor	−	−	−	−	−	−	−	−	−	−	−	−	−	−	+	+	+	+	+	+
LEPBI_I0565	ABZ96703.1	sigma factor regulatory protein	−	−	−	−	−	−	−	−	−	−	−	−	−	−	+	+	+	+	+	+
LEPBI_I0521	ABZ96659.1	anti-sigma factor antagonist	−	−	−	−	−	−	−	−	−	−	−	−	−	−	+	+	+	+	+	+
LEPBI_I0496	ABZ96634.1	anti-sigma-B factor antagonist	−	−	−	−	−	−	−	−	−	−	−	−	−	−	+	+	+	+	+	+
LEPBI_I0167	ABZ96312.1	STAS_anti-anti-sigma_factors	−	−	−	−	−	−	−	−	−	−	−	−	−	−	+	+	+	+	+	+
LIC20111	AAS72140.1	sigma factor regulatory protein	+	+	+	+	+	+	+	+	+	−	−	−	−	−	−	−	−	−	−	−
LIC20108	AAS72137.1	anti-sigma factor antagonist	+	+	+	+	+	+	+	+	+	−	−	−	−	−	−	−	−	−	−	−
LIC20089	AAS72118.1	sigma factor regulatory protein	+	+	+	+	+	+	+	+	+	+	+	+	+	+	+	+	+	+	+	+
LIC20048	AAS72077.1	anti-sigma factor antagonist	+	+	+	+	+	+	+	+	+	+	+	+	+	+	−	−	−	−	−	−
LIC13344	AAS71886.1	anti-sigma regulatory factor	+	+	+	+	+	+	+	+	+	+	+	+	+	+	+	+	+	+	+	+
LIC13273	AAS71817.1	sigma factor regulatory protein	+	+	+	+	+	+	+	+	+	+	+	+	+	+	−	−	−	−	−	−
LIC13103	AAS71649.1	anti-anti-sigma_factors	+	+	+	−	−	−	−	−	+	+	+	+	+	+	−	+	+	+	+	+
LIC12942	AAS71493.1	anti-sigma regulatory factor	+	+	+	+	+	+	+	+	+	+	+	+	+	+	+	+	+	+	+	+
LIC12937	AAS71488.1	anti-anti-sigma_factors	+	+	+	+	+	+	+	+	+	+	+	+	+	+	+	+	+	+	+	+
LIC12787	AAS71341.1	anti-sigma factor antagonist	+	+	−	+	+	+	+	+	+	+	+	+	+	−	+	+	+	+	+	+
LIC12766	AAS71323.1	anti-anti-sigma_factors	+	+	+	+	+	+	+	+	+	−	−	−	−	−	−	−	−	−	−	−
LIC12496	AAS71061.1	sigma factor regulatory protein	+	+	+	+	+	+	+	+	+	+	+	+	+	+	−	−	−	−	−	−
LIC12398	AAS70967.1	anti-sigma factor antagonist	+	+	+	+	+	+	+	+	+	+	+	+	+	+	−	−	−	−	−	−
LIC12324	AAS70895.1	serine/threonine kinase with GAF domain	+	+	+	+	+	+	+	+	+	+	+	+	+	+	−	−	−	−	−	−
LIC12070	AAS70641.1	anti-anti-sigma_factors	+	+	+	+	+	+	+	+	+	−	−	−	−	−	−	−	−	−	−	−
LIC12012	AAS70588.1	anti-sigma factor antagonist	+	+	+	+	+	+	+	+	+	−	+	+	+	+	−	−	−	−	−	−
LIC11801	AAS70390.1	anti-sigma factor antagonist	+	+	+	+	+	+	+	+	+	+	+	+	+	+	−	−	−	−	−	−
LIC11796	AAS70385.1	sigma factor regulatory protein	+	+	+	+	+	+	+	+	+	+	+	+	+	+	−	−	−	−	−	−
LIC11525	AAS70121.1	anti-sigma factor antagonist	+	+	+	+	+	+	+	+	+	−	−	−	−	−	−	−	−	−	−	−
LIC11516	AAS70112.1	anti-sigma factor antagonist	+	+	+	+	+	+	+	+	+	+	+	+	+	+	−	−	−	−	−	−
LIC11515	AAS70111.1	sigma factor regulatory protein	+	+	−	+	+	+	+	+	+	+	+	+	+	+	−	−	−	−	−	−
LIC11496	AAS70094.1	anti-anti-sigma_factors	+	+	+	+	+	+	+	+	+	+	+	+	+	+	−	−	−	−	−	−
LIC11480	AAS70078.1	serine-protein kinase	+	+	+	+	+	+	+	+	+	+	+	+	+	+	+	−	+	+	+	+
LIC11426	AAS70025.1	sigma factor regulatory protein	+	+	+	+	+	+	+	+	+	+	+	+	+	+	−	−	−	−	−	−
LIC11025	AAS69632.1	anti-sigma-factor antagonist	+	+	+	+	+	+	+	+	+	+	+	+	+	+	+	+	+	+	+	+
LIC11004	AAS69614.1	anti-sigma factor antagonist	+	+	+	+	+	+	+	+	−	+	+	+	+	+	+	+	+	+	+	+
LIC10950	AAS69561.1	sigma factor regulatory protein	+	+	+	+	+	+	+	−	+	+	+	+	+	+	+	+	+	+	+	+
LIC10626	AAS69247.1	anti-sigma factor antagonist	+	+	+	+	+	+	+	+	+	+	+	+	+	+	+	+	+	+	+	+
LIC10598	AAS69219.1	sigma factor regulatory protein	+	+	+	+	+	+	+	+	+	+	+	+	+	+	−	−	−	−	−	−
LIC10570	AAS69191.1	anti-sigma factor antagonist	+	+	+	+	+	+	+	+	+	+	+	+	+	+	+	+	+	+	+	+
LIC10550	AAS69171.1	anti-sigma factor antagonist	+	+	+	+	+	+	+	+	+	+	+	+	+	+	+	+	+	+	+	+
LIC10344	AAS68971.1	anti-anti-sigma_factors	+	+	+	−	+	+	+	+	+	+	+	−	+	+	−	+	+	+	−	+
LIC10300	AAS68927.1	anti-anti-sigma_factors	+	+	+	+	+	+	+	+	+	+	+	+	+	+	−	−	−	−	−	−
P = Pathogenic species; I = Intermediate species; S = Saprophytic species

## Sheet: sigma factors (final)
				L. interrogans sv. Copenhageni str. Fiocruz L1-130	L. kirschneri sv. Cynopteri str. 3522 CT	L. noguchii sv. Panama str. CZ 214T	L. alstoni sv. Pingchang str. 80-412	L. weilii sv. undetermined str. LNT 1234	L. alexanderi sv. Manhao str. 3 L 60T	L. borgpetersenii sv. Javanica str. UI 09931	L. santarosai sv. Shermani str. 1342KT	L. kmetyi sv. Malaysia str. Bejo-Iso9T	L. fainei sv. Hurstbridge str. BUT 6T	L. broomii sv. Hurstbridge str. 5399T	L. wolffii sv. Khorat str. Khorat-H2T	L. licerasiae sv. Varillal str. VAR 010	L. inadai sv. Lyme str. 10T	L. wolbachii sv. Codice str. CDC	L. yanagawae sv. Saopaulo str. Sao Paulo	L. biflexa sv. Patoc str. Patoc1	L. vanthielii sv. Holland str. Waz Holland	L. terpstrae sv. Hualin str. LT 11-33T	L. meyeri sv. Hardjo str. Went 5
	Protein name	GenBank Accession	Function	P	P	P	P	P	P	P	P	P	I	I	I	I	I	S	S	S	S	S	S
sigma factors
	LIC11701 (RpoD)	AAS70290.1	sigma 70	AAS70290.1	EPG50966.1|	EQA69854.1|	EQA81350.1|	EMN44914.1|	EQA63216.1|	EPG59547.1|	EPG82939.1|	EQA53106.1|	EPG76142.1|	EQA43443.1|	EPG66678.1|	EIE01642.1|	EQA37747.1|	EOQ97364.1|	EOQ90541.1|	ABZ97674.1|	EMY68638.1|	EMY61220.1|	EKJ84892.1|
	LIC11380 (FliA, sigma F)	AAS69981.1	sigma F	AAS69981.1	EPG49605.1|	EQA70861.1|	EQA79998.1|	EMN45004.1|	EQA62509.1|	EPG59639.1|	EPG82699.1|	EQA52471.1|	EPG75951.1|	EQA46856.1|	EPG67621.1|	EID99802.1|	EQA36728.1|	EOQ96016.1|	EOQ87830.1|	ABZ97070.1|	EMY68208.1|	EMY62324.1|	EKJ86657.1|
	LIC11545 (RpoN)	AAS70141.1	sigma N	AAS70141.1	EPG51221.1|	EQA70350.1|	EQA81449.1|	EMN45404.1|	EQA61674.1|	EPG57137.1|	EPG83057.1|	EQA53606.1|	EPG75807.1|	EQA43659.1|	EPG66772.1|	EIE01615.1|	EQA37524.1|	EOQ95215.1|	EOQ90554.1|	ABZ97757.1|	EMY68699.1|	EMY61179.1|	EKJ85008.1|
EBPs	LIC10132 (EBP1)	AAS68765.1	enhance binding protein	AAS68765.1	EPG50552.1|	EQA73948.1|	EQA81138.1|	EMN45971.1|	EQA64844.1|	EPG57794.1|	EPG82820.1|	EQA54127.1|	EPG72958.1|	EQA44144.1|	EPG65566.1|	EIE01955.1|	EQA35227.1|	EOQ96322.1|	EOQ89979.1|	ABZ96704.1|	EMY67951.1|	EMY63491.1|	EKJ88275.1|
	LIC11549 (EBP2)	AAS70145.1	enhance binding protein	AAS70145.1	EPG50947.1|	EQA70304.1|	EQA81371.1|	EMN45378.1|	EQA61681.1|	EPG57041.1|	EPG82981.1|	EQA54856.1|	EPG75907.1|	EQA43263.1|	EPG66840.1|	EIE01805.1|	EQA37575.1|

## Sheet: ECFs (final)
				L. interrogans sv. Copenhageni str. Fiocruz L1-130	L. kirschneri sv. Cynopteri str. 3522 CT	L. noguchii sv. Panama str. CZ 214T	L. alstoni sv. Pingchang str. 80-412	L. weilii sv. undetermined str. LNT 1234	L. alexanderi sv. Manhao str. 3 L 60T	L. borgpetersenii sv. Javanica str. UI 09931	L. santarosai sv. Shermani str. 1342KT	L. kmetyi sv. Malaysia str. Bejo-Iso9T	L. fainei sv. Hurstbridge str. BUT 6T	L. broomii sv. Hurstbridge str. 5399T	L. wolffii sv. Khorat str. Khorat-H2T	L. licerasiae sv. Varillal str. VAR 010	L. inadai sv. Lyme str. 10T	L. wolbachii sv. Codice str. CDC	L. yanagawae sv. Saopaulo str. Sao Paulo	L. biflexa sv. Patoc str. Patoc1	L. vanthielii sv. Holland str. Waz Holland	L. terpstrae sv. Hualin str. LT 11-33T	L. meyeri sv. Hardjo str. Went 5
	Protein name	GenBank Accession	Function	P	P	P	P	P	P	P	P	P	I	I	I	I	I	S	S	S	S	S	S
ECFs
	LIC12490	AAS71055.1		AAS71055.1	EPG49464.1|	EQA71610.1|	EQA78318.1|	EMN43227.1|	EQA63344.1|	EPG59790.1|	EPG82323.1|	EQA51635.1|	EPG76297.1|	EQA44630.1|	EPG67823.1|	EIE00835.1|	EQA38417.1|	EOQ98066.1|	EOQ88403.1|	ABZ98252.1	EMY69582.1|	EMY61013.1|	EKJ88787.1|
	LIC11817	AAS70405.1		AAS68777.1	EPG50692.1|	EQA73836.1|	EQA81086.1|				EPG82841.1|	EQA54556.1|	EPG73240.1|	EQA45804.1|	EPG65237.1|	EIE02731.1|	EQA35352.1|
	LIC10144	AAS68777.1		AAS68853.1	EPG50380.1|	EQA73827.1|	EQA82488.1|	EMN44195.1|	EQA63777.1|	EPG58093.1|	EPG80870.1|	EQA52883.1|	EPG72939.1|	EQA43899.1|	EPG65083.1|	EIE02347.1|		EOQ95847.1|	EOQ90278.1		EMY69051.1|	EMY62142.1|	EKJ86640.1|
	LIC10386	AAS69009.1		AAS69009.1	EPG48771.1|	EQA72176.1|	EQA79343.1|	EMN45900.1|	EQA64694.1|	EPG58270.1|	EPG80874.1|		EPG73951.1	EQA44597.1|	EPG65524.1|	EIE02231.1|	EQA35259.1|
	LIC12757	AAS71314.1		AAS69180.1	EPG50618.1|	EQA70555.1|	EQA78915.1|	EMN44179.1|	EQA60712.1|	EPG58631.1|	EPG84235.1|	EQA55328.1|	EPG73504.1|	EQA44297.1|	EPG65358.1|	EIE02752.1|	EQA34846.1|
	LIC10225	AAS68853.1		AAS70405.1	EPG51177.1|	EQA69590.1	EQA79834.1|	EMN43135.1|	EQA63058.1|	EPG59224.1|	EPG82188.1|	EQA51765.1|	EPG75305.1|	EQA43292.1|	EPG66935.1	EIE01573.1|	EQA37068.1|
	LIC10559	AAS69180.1		AAS71314.1		EQA71081.1|	EQA81584.1|		EQA64291.1|	EPG58269.1|	EPG83320.1|	EQA52262.1|
	LIC13266	AAS71810.1		AAS71810.1	EPG48578.1|	EQA70156.1|	EQA80523.1|	EMN46003.1|	EQA63531.1|	EPG57525.1|	EPG81047.1|	EQA54261.1|	EPG74027.1|	EQA44925.1|	EPG64994.1|	EIE03012.1|	EQA35346.1|
	LIC13285	AAS71829.1		AAS71829.1	EPG48674.1|	EQA70148.1|	EQA80570.1|	EMN45917.1|	EQA63547.1|	EPG57435.1|	EPG81050.1|	EQA54435.1|	EPG73231.1|	EQA45425.1|	EPG65279.1|	EIE02795.1|	EQA35652.1|
	LEPBI_I1070	ABZ97193.1										EQA55753.1|	EPG75402.1|	EQA43474.1|	EPG64584.1|	EIE01169.1|				ABZ97193.1	EMY68224.1|	EMY62401.1|	EKJ84938.1|
	LEPBI_I1238	ABZ97351.1																EOQ94889.1|	EOQ86861.1|	ABZ99591.1|	EMY67822.1|	EMY59800.1|	EKJ85767.1|
	LEPBI_I2109	ABZ98211.1										EQA51858.1|	EPG74135.1|	EQA45989.1|	EPG67834.1|	EIE00908.1|	EQA36678.1|	EOQ96779.1|	EOQ90358.1|	AAS72144.1	EMY68315.1|	EMY62221.1|	EKJ87916.1|
	LEPBI_II0053	ABZ99591.1|																EOQ98224.1|	EOQ88258.1|	ABZ98211.1	EMY69378.1|	EMY61702.1|	EKJ88647.1|

## Sheet: anti-sigma factor regulators 
			L. interrogans sv. Copenhageni str. Fiocruz L1-130	L. kirschneri sv. Cynopteri str. 3522 CT	L. noguchii sv. Panama str. CZ 214T	L. alstoni sv. Pingchang str. 80-412	L. weilii sv. undetermined str. LNT 1234	L. alexanderi sv. Manhao str. 3 L 60T	L. borgpetersenii sv. Javanica str. UI 09931	L. santarosai sv. Shermani str. 1342KT	L. kmetyi sv. Malaysia str. Bejo-Iso9T	L. fainei sv. Hurstbridge str. BUT 6T	L. broomii sv. Hurstbridge str. 5399T	L. wolffii sv. Khorat str. Khorat-H2T	L. licerasiae sv. Varillal str. VAR 010	L. inadai sv. Lyme str. 10T	L. wolbachii sv. Codice str. CDC	L. yanagawae sv. Saopaulo str. Sao Paulo	L. biflexa sv. Patoc str. Patoc1	L. vanthielii sv. Holland str. Waz Holland	L. terpstrae sv. Hualin str. LT 11-33T	L. meyeri sv. Hardjo str. Went 5
Protein name	GenBank Accession	Function	P	P	P	P	P	P	P	P	P	I	I	I	I	I	S	S	S	S	S	S
LEP1GSC185_1363	EIE02915.1										EQA55221.1|	EPG73579.1|	EQA43907.1|	EPG64898.1|	EIE02915.1|	EQA35610.1|
LEP1GSC185_2992	EIE01750.1														EIE01750.1|
LEP1GSC185_2622	EID99927.1											EPG76091.1|	EQA47298.1|	EPG67526.1|	EID99927.1|	EQA36279.1|
LEPBI_I3230	ABZ99295.1																EOQ95994.1|	EOQ89865.1|	ABZ99295.1|	EMY68339.1|	EMY62558.1|	EKJ86501.1|
LEPBI_I2292	ABZ98387.1	anti-anti-sigma_factors															EOQ97724.1|	EOQ87605.1|	ABZ98387.1"	EMY71652.1|	EMY59986.1|	EKJ86805.1|
LEPBI_I2282	ABZ98377.1	anti-anti-sigma regulatory factor															EOQ97806.1|	EOQ87730.1|	ABZ98377.1"	EMY71663.1|	EMY60155.1|	EKJ86918.1|
LEPBI_I1743	ABZ97849.1	putative sigma factor sigB regulation protein RsbU [															EOQ96134.1|	EOQ88340.1|	ABZ97849.1	EMY68832.1|	EMY61186.1|	EKJ85111.1|
LEPBI_I1741	ABZ97847.1	anti-sigma factor antagonist															EOQ97071.1|	EOQ88383.1|	ABZ97847.1	EMY68752.1|	EMY61422.1|	EKJ84945.1|
LEPBI_I1713	ABZ97819.1	anti-sigma factor antagonist															EOQ95305.1|	EOQ88178.1|	ABZ97819.1	EMY68667.1|	EMY61222.1|	EKJ85178.1|
LEPBI_I1584	ABZ97691.1	anti-sigma factor antagonist															EOQ96725.1|	EOQ90624.1|	ABZ97691.1	EMY68648.1|	EMY61054.1|	EKJ84911.1|
LEPBI_I1576	ABZ97683.1	anti-sigma factor antagonist															EOQ96253.1|	EOQ90536.1|	ABZ97683.1	EMY68738.1|	EMY61377.1|	EKJ85436.1|
LEPBI_I1575	ABZ97682.1	putative phosphodiesterase or phosphatase			EQA72476.1|												EOQ96350.1|	EOQ90519.1|	ABZ97682.1	EMY68889.1|	EMY61481.1|	EKJ85661.1|
LEPBI_I1405	ABZ97514.1	anti-anti-sigma_factors															EOQ97404.1|	EOQ90497.1|	ABZ97514.1	EMY69880.1|	EMY61056.1|	EKJ85052.1|
LEPBI_I1321	ABZ97431.1	anti-sigma factor antagonist															EOQ95226.1|	EOQ87570.1|	ABZ97431.1"	EMY69972.1|		EKJ85465.1|
LEPBI_I1036	ABZ97159.1	anti-sigma regulatory factor															EOQ95214.1|	EOQ90322.1|	ABZ97159.1	EMY68229.1|	EMY62333.1|	EKJ87232.1|
LEPBI_I0926	ABZ97050.1	anti-sigmafactors															EOQ95783.1|	EOQ87857.1|	ABZ97050.1	EMY68320.1|	EMY62299.1|	EKJ88455.1|
LEPBI_I0904	ABZ97029.1	anti-sigma regulatory factor															EOQ96916.1|	EOQ87863.1|	ABZ97029.1	EMY68140.1|	EMY62306.1|	EKJ88029.1|
LEPBI_I0565	ABZ96703.1	sigma factor regulatory protein															EOQ96004.1|	EOQ88951.1|	ABZ96703.1	EMY67933.1|	EMY63417.1|	EKJ86368.1|
LEPBI_I0521	ABZ96659.1	anti-sigma factor antagonist															EOQ96554.1	EOQ89164.1|	ABZ96659.1	EMY67991.1|	EMY63501.1|	EKJ86799.1|
LEPBI_I0496	ABZ96634.1	anti-sigma-B factor antagonist															EOQ96269.1|	EOQ89056.1|	ABZ96634.1	EMY68074.1|	EMY63440.1|	EKJ87601.1|
LEPBI_I0167	ABZ96312.1																EOQ95229.1|	EOQ89997.1|	ABZ96312.1	EMY71316.1|	EMY62503.1|	EKJ86701.1|
LIC20111	AAS72140.1	sigma factor regulatory protein	AAS72140.1	EPG50037.1|	EQA71838.1|	EQA79066.1|	EMN44510.1|	EQA60636.1|	EPG56009.1|	EPG80768.1|	EQA55657.1 and EQA55014.1
LIC20108	AAS72137.1	anti-sigma factor antagonist	AAS72137.1	EPG50033.1|	EQA71649.1|	EQA79047.1|	EMN44558.1|	EQA60643.1|	EPG56174.1|	EPG80751.1|	EQA55613.1|
LIC20089	AAS72118.1	sigma factor regulatory protein	AAS72118.1	EPG50060.1|	EQA71959.1|	EQA78835.1|	EMN44548.1|	EQA61774.1|	EPG56074.1|	EPG83645.1|	EQA55687.1|	EPG72685.1|	EQA46441.1|	EPG66104.1|	EIE01017.1|	EQA35749.1|	EOQ94900.1|	EOQ86978.1|	ABZ99706.1|	EMY70236.1|	EMY59844.1|	EKJ85760.1|
LIC20048	AAS72077.1	anti-sigma factor antagonist	AAS72077.1	EPG49954.1|	EQA71845.1|	EQA78506.1|	EMN42822.1|	EQA64117.1|	EPG55988.1|	EPG80715.1|	EQA55695.1|	EPG72793.1|	EQA46532.1|	EPG65912.1|	EIE01290.1|	EQA35722.1|
LIC13344	AAS71886.1	anti-sigma regulatory factor	AAS71886.1	EPG48558.1|	EQA73549.1|	EQA82381.1|	EMN45855.1|	EQA63744.1|	EPG57925.1|	EPG80905.1|	EQA52066.1|	EPG74450.1|	EQA45336.1|	EPG64983.1|	EIE02483.1|	EQA35518.1|	EOQ95529.1|	EOQ88963.1|	ABZ96808.1|	EMY70714.1|	EMY63517.1|	EKJ87559.1|
LIC13273	AAS71817.1	sigma factor regulatory protein	AAS71817.1	EPG48614.1|	EQA70247.1|	EQA80565.1|	EMN46067.1|	EQA63504.1|	EPG58443.1|	EPG80976.1|	EQA55116.1|	EPG73372.1|	EQA44895.1|	EPG64890.1|	EIE02067.1|	EQA35689.1|
LIC13103	AAS71649.1	anti-anti-sigma_factors	AAS71649.1	EPG50250.1|	EQA73351.1|						EQA55224.1|	EPG73338.1|	EQA44599.1|	EPG64285.1|	EIE02836.1|	EQA36267.1|		EOQ89591.1|	ABZ96219.1|	|EMY69196.1|	EMY62713.1|	EKJ87737.1|
LIC12942	AAS71493.1	anti-sigma regulatory factor	AAS71493.1	EPG50662.1|	EQA71091.1|	EQA82305.1|	EMN42802.1|	EQA62281.1|	EPG56875.1|	EPG83411.1|	EQA51967.1|	EPG73937.1|	EQA45051.1|	EPG64457.1|	EIE02308.1|	EQA37642.1|	EOQ95755.1|	EOQ89746.1|	ABZ96971.1|	EMY69328.1|	EMY60420.1|	EKJ86802.1|
LIC12937	AAS71488.1	anti-anti-sigma_factors	AAS71488.1	EPG50415.1|	EQA71098.1|	EQA82291.1|	EMN44095.1|	EQA60770.1|	EPG58561.1|	EPG84218.1|	EQA54889.1|	EPG73069.1|	EQA45170.1|	EPG64231.1|	EIE02549.1|	EQA37941.1|	EOQ97259.1|	EOQ89001.1|	ABZ99146.1|	EMY70636.1|	EMY61966.1|	EKJ86514.1|
LIC12787	AAS71341.1	anti-sigma factor antagonist	AAS71341.1	EPG50172.1|		EQA80703.1|	EMN42856.1|	EQA61952.1|	EPG57012.1|	EPG82356.1|	EQA51850.1|	EPG73298.1|	EQA45798.1|	EPG67791.1|	|EIE00750.1|		EOQ97151.1|	EOQ88430.1|	ABZ97313.1|	EMY70512.1|	EMY63203.1|	EKJ85348.1|
LIC12766	AAS71323.1	anti-anti-sigma_factors	AAS71323.1	EPG50233.1|	EQA71017.1|	EQA81319.1|	EMN46310.1|	EQA64401.1|	EPG57881.1|	EPG81942.1|	EQA54994.1|
LIC12496	AAS71061.1	sigma factor regulatory protein	AAS71061.1	EPG49433.1|	EQA71407.1|	EQA82117.1|	EMN43204.1|	EQA63316.1	EPG59843.1|	EPG82357.1|	EQA51620.1|	EPG76229.1|	EQA44460.1|	EPG67414.1|	EIE00754.1|	EQA38623.1|
LIC12398	AAS70967.1	anti-sigma factor antagonist	AAS70967.1	EPG48318.1|	EQA71346.1|	EQA82086.1|	EMN43488.1|	EQA64498.1|	EPG56888.1|	EPG81809.1|	EQA51887.1|	|EPG76398.1|	EQA45267.1|	EPG64220.1|	EIE03349.1|	EQA38655.1|
LIC12324	AAS70895.1	serine/threonine kinase with GAF domain	AAS70895.1	EPG51105.1|	EQA70030.1|	EQA81921.1|	EMN42393.1|	EQA63278.1|	EPG56876.1|	EPG84165.1|	EQA54481.1|	EPG75142.1|	EQA45310.1|	EPG67815.1|	EIE00935.1|	EQA38517.1|
LIC12070	AAS70641.1	anti-anti-sigma_factors	AAS70641.1	EPG51709.1|	EQA72904.1|	EQA78390.1|	EMN43170.1|	EQA61102.1|	EPG56333.1|	EPG82492.1|	EQA52955.1|
LIC12012	AAS70588.1	anti-sigma factor antagonist	AAS70588.1	EPG51008.1|	EQA72918.1|	EQA78380.1|	EMN45155.1|	EQA61081.1|	EPG57038.1|	EPG82420.1|	EQA54637.1|		EQA43472.1|	EPG67357.1|	EIE00335.1|	EQA37234.1|
LIC11801	AAS70390.1	anti-sigma factor antagonist	AAS70390.1	EPG51374.1|	EQA69440.1|	EQA79854.1|	EMN43234.1|	EQA63214.1|	EPG59129.1|	EPG82163.1|	EQA54469.1|	EPG75389.1|	EQA43241.1|	EPG66593.1|	EIE01577.1	EQA37090.1|
LIC11796	AAS70385.1	sigma factor regulatory protein	AAS70385.1	EPG50891.1|	EQA69751.1|	EQA79954.1|	EMN43180.1|	EQA63042.1|	EPG59498.1|	EPG82109.1|	EQA55060.1|	EPG75249.1|	EQA43700.1|	EPG67211.1|	EIE01658.1|	EQA37139.1|
LIC11525	AAS70121.1	anti-sigma factor antagonist	AAS70121.1	EPG49996.1|	EQA72516.1|	EQA80814.1|	EMN45331.1|	EQA62310.1|	EPG57270.1|	EPG82999.1	EQA52020.1|
LIC11516	AAS70112.1	anti-sigma factor antagonist	AAS70112.1	EPG49929.1|	EQA72499.1|	EQA80812.1|	EMN45405.1|	EQA62316.1|	EPG57246.1|	EPG82992.1|	EQA54509.1|	EPG75834.1|	EQA43240.1|	EPG66531.1|	EIE01547.1|	EQA37264.1|
LIC11515	AAS70111.1	sigma factor regulatory protein	AAS70111.1	EPG50017.1|		EQA80797.1|	EMN45456.1|	EQA62308.1|	EPG57223.1|	EPG82996.1|	EQA54714.1|	EPG75900.1|	EQA43289.1|	EPG67344.1|	EIE01534.1|	EQA37683.1|
LIC11496	AAS70094.1	anti-anti-sigma_factors	AAS70094.1	EPG49613.1|	EQA70866.1|	EQA78444.1|	EMN45444.1|	EQA61325.1|	EPG57198.1|	EPG82600.1|	EQA53715.1|	EPG75773.1|	EQA46734.1|	EPG67894.1|	EIE00139.1|	EQA36142.1|
LIC11480	AAS70078.1	serine-protein kinase	AAS70078.1	EPG49511.1|	EQA70783.1|	EQA78393.1|	EMN43616.1|	EQA61014.1|	EPG57078.1|	EPG82519.1|	EQA53793.1|	EPG75841.1|	EQA47133.1|	EPG68063.1|	EIE00005.1|	EQA36092.1|	EOQ97807.1|		ABZ98447.1|	EMY70398.1|	EMY60217.1|	EKJ88419.1|
LIC11426	AAS70025.1	sigma factor regulatory protein	AAS70025.1	EPG49815.1|	EQA70851.1|	EQA82151.1|	EMN45030.1|	EQA62351.1|	EPG59061.1|	EPG83206.1|	EQA53689.1|	EPG75208.1|	EQA43405.1|	EPG66872.1|	EIE00421.1|	EQA37448.1|
LIC11025	AAS69632.1	anti-sigma-factor antagonist	AAS69632.1	EPG49396.1|	EQA70456.1|	EQA81567.1|	EMN43495.1|	EQA64396.1|	EPG56961.1|	EPG84372.1|	EQA51597.1|	EPG76245.1|	EQA43942.1|	EPG67419.1|	EIE00508.1|	EQA38449.1|	EOQ95349.1|	EOQ87884.1|	ABZ97030.1|	EMY68135.1|	EMY62381.1|	EKJ87774.1|
LIC11004	AAS69614.1	anti-sigma factor antagonist	AAS69614.1	EPG48162.1|	EQA71269.1|	EQA79106.1|	EMN42509.1|	EQA63965.1|	EPG59783.1|	EPG81288.1|		EPG76373.1|	EQA45448.1|	EPG68141.1	EIE00970.1|	EQA38740.1|	EOQ97548.1|	EOQ87585.1|	ABZ98421.1|	EMY70418.1|	EMY60173.1|	EKJ87257.1|
LIC10950	AAS69561.1	sigma factor regulatory protein	AAS69561.1	EPG48219.1|	EQA71279.1|	EQA81741.1|	EMN43462.1|	EQA62227.1|	EPG56712.1|		EQA54358.1|	EPG73142.1|	EQA44117.1|	EPG64096.1|	EIE02346.1|	EQA36569.1|	EOQ96194.1|	EOQ90341.1|	ABZ97185.1|	EMY68180.1|	EMY62286.1|	EKJ87687.1|
LIC10626	AAS69247.1	anti-sigma factor antagonist	AAS69247.1	EPG49116.1|	EQA70664.1|	EQA81223.1|	EMN46506.1|	EQA64399.1|	EPG57521.1|	EPG81713.1|	EQA54900.1|	EPG74145.1|	EQA45190.1|	EPG65624.1|	EIE03014.1|	EQA38847.1|	EOQ98469.1|	EOQ88700.1|	ABZ98770.1|	EMY71031.1|	EMY60720.1|	EKJ87981.1|
LIC10598	AAS69219.1	sigma factor regulatory protein	AAS69219.1	EPG48992.1|	EQA70573.1|	EQA78563.1|	EMN43853.1|	EQA63573.1|	EPG57450.1|	EPG83996.1|	EQA51971.1|	EPG74225.1|	EQA44638.1|	EPG65074.1|	EIE02913.1|	EQA35105.1|
LIC10570	AAS69191.1	anti-sigma factor antagonist	AAS69191.1	EPG48842.1|	EQA73436.1|	EQA79422.1|	EMN45654.1|	EQA64697.1|	EPG57545.1|	EPG80816.1|	EQA53313.1|	EPG73790.1|	EQA44489.1|	EPG64817.1|	EIE02659.1|	EQA35639.1|	EOQ96574.1|	EOQ89969.1|	ABZ96210.1|	EMY69168.1|	EMY63009.1|	EKJ88127.1|
LIC10550	AAS69171.1	anti-sigma factor antagonist	AAS69171.1	EPG50288.1|	EQA73452.1|	EQA80770.1|	EMN46002.1|	EQA64623.1|	EPG57783.1|	EPG84011.1|	EQA52918.1|	EPG73699.1|	EQA45636.1|	EPG64692.1|	EIE02437.1|	EQA35186.1|	EOQ98590.1|	EOQ88558.1|	ABZ98746.1|	EMY71037.1|	EMY60704.1|	EKJ87243.1|
LIC10344	AAS68971.1	anti-anti-sigma_factors	AAS68971.1	EPG50286.1|	EQA72099.1|		EMN44102.1|	EQA60829.1|	EPG58832.1|	EPG81613.1|	EQA53454.1|	EPG73849.1|	EQA46027.1|		EIE02887.1|	EQA35595.1|		EOQ89641.1|	ABZ99335.1|	EMY71679.1|		EKJ87505.1|
LIC10300	AAS68927.1	anti-anti-sigma_factors	AAS68927.1	EPG50301.1|	EQA72168.1|	EQA82550.1|	EMN44245.1|	EQA64721.1|	EPG58437.1|	EPG81013.1|	EQA52429.1|	EPG74375.1|	EQA43947.1|	EPG65520.1|	EIE03348.1|	EQA34836.1|
