# Supplementary material for: What Makes a Bacterial Species Pathogenic?:Comparative Genomic Analysis of the Genus Leptospira
Source: PLoS Negl Trop Dis. 2016 Feb 18;10(2):e0004403. doi: 10.1371/journal.pntd.0004403 (PMC4758666; doi:10.1371/journal.pntd.0004403)
Supplement: S15 Table — (XLSX) [file pntd.0004403.s022.xlsx]

## Sheet: pathogens_intermediates_saproph
S15 Table. Core Two Component System (TCS) Proteins conserved among Leptospira spp.
		L. interrogans sv. Copenhageni str. Fiocruz L1-130	L. kirschneri sv. Cynopteri str. 3522 CT	L. noguchii sv. Panama str. CZ 214T	L. alstoni sv. Pingchang str. 80-412	L. weilii sv. undetermined str. LNT 1234	L. alexanderi sv. Manhao str. 3 L 60T	L. borgpetersenii sv. Javanica str. UI 09931	L. santarosai sv. Shermani str. 1342KT	L. kmetyi sv. Malaysia str. Bejo-Iso9T	L. fainei sv. Hurstbridge str. BUT 6T	L. broomii sv. Hurstbridge str. 5399T	L. wolffii sv. Khorat str. Khorat-H2T	L. licerasiae sv. Varillal str. VAR 010	L. inadai sv. Lyme str. 10T	L. wolbachii sv. Codice str. CDC	L. yanagawae sv. Saopaulo str. Sao Paulo	L. biflexa sv. Patoc str. Patoc1	L. vanthielii sv. Holland str. Waz Holland	L. terpstrae sv. Hualin str. LT 11-33T	L. meyeri sv. Hardjo str. Went 5
Cluster ID	Protein Name	Pathogenic Species									Intermediate species					Saprophytic Species
622	O_RR	NT03LI0655	LEP1GSC049_1318	LEP1GSC059_0326	LEP1GSC193_3179	LEP1GSC086_2614	LEP1GSC062_4004	LEP1GSC103_2309	LEP1GSC048_2344	LEP1GSC052_3182	LEP1GSC058_3703	LEP1GSC050_3684	LEP1GSC061_3212	LEP1GSC185_0890	LEP1GSC047_1107	LEP1GSC195_3246	LEP1GSC202_1182	NT05LB0062	LEP1GSC199_3378	LEP1GSC203_3230	LEP1GSC017_1814
731	O_RR	NT03LI0773	LEP1GSC049_1430	LEP1GSC059_4678	LEP1GSC193_3908	LEP1GSC086_0764	LEP1GSC062_1812	LEP1GSC103_0466	LEP1GSC048_0366	LEP1GSC052_2827	LEP1GSC058_2607	LEP1GSC050_2556	LEP1GSC061_4114	LEP1GSC185_0643	LEP1GSC047_3513	LEP1GSC195_1197	LEP1GSC202_3253	NT05LB1975	LEP1GSC199_2097	LEP1GSC203_1346	LEP1GSC017_3730
1206	O_RR	NT03LI1277	LEP1GSC049_4326	LEP1GSC059_1516	LEP1GSC193_0484	LEP1GSC086_1454	LEP1GSC062_1121	LEP1GSC103_3972	LEP1GSC048_0780	LEP1GSC052_0722	LEP1GSC058_1693	LEP1GSC050_2013	LEP1GSC061_1414	LEP1GSC185_0028	LEP1GSC047_4079	LEP1GSC195_3587	LEP1GSC202_0848	NT05LB3273	LEP1GSC199_3013	LEP1GSC203_3553	LEP1GSC017_1469
1231	O_RR	NT03LI1303	LEP1GSC049_4354	LEP1GSC059_1543	LEP1GSC193_2725	LEP1GSC086_0564	LEP1GSC062_0391	LEP1GSC103_2019	LEP1GSC048_3389	LEP1GSC052_2003	LEP1GSC058_1258	LEP1GSC050_2220	LEP1GSC061_0679	LEP1GSC185_0225	LEP1GSC047_2406	LEP1GSC195_2549	LEP1GSC202_1884	NT05LB0788	LEP1GSC199_4115	LEP1GSC203_2534	LEP1GSC017_2481
1690	NO_HK	NT03LI1779	LEP1GSC049_2547	LEP1GSC059_0662	LEP1GSC193_1835	LEP1GSC086_3881	LEP1GSC062_2973	LEP1GSC103_1669	LEP1GSC048_3297	LEP1GSC052_1199	LEP1GSC058_0400	LEP1GSC050_1273	LEP1GSC061_2006	LEP1GSC185_2961	LEP1GSC047_3841	LEP1GSC195_1603	LEP1GSC202_3965	NT05LB1700	LEP1GSC199_1813	LEP1GSC203_1622	LEP1GSC017_3414
1691	NO_RR	NT03LI1780	LEP1GSC049_2546	LEP1GSC059_0661	LEP1GSC193_1836	LEP1GSC086_3880	LEP1GSC062_2972	LEP1GSC103_1670	LEP1GSC048_3296	LEP1GSC052_1198	LEP1GSC058_0401	LEP1GSC050_1272	LEP1GSC061_2007	LEP1GSC185_2960	LEP1GSC047_3842	LEP1GSC195_1602	LEP1GSC202_3966	NT05LB1701	LEP1GSC199_1814	LEP1GSC203_1621	LEP1GSC017_3415
1925	O_RR	NT03LI2027	LEP1GSC049_2325	LEP1GSC059_2215	LEP1GSC193_2085	LEP1GSC086_0228	LEP1GSC062_3696	LEP1GSC103_3439	LEP1GSC048_1037	LEP1GSC052_1310	LEP1GSC058_2267	LEP1GSC050_1422	LEP1GSC061_1890	LEP1GSC185_3081	LEP1GSC047_0747	LEP1GSC195_0068	LEP1GSC202_2425	NT05LB2369	LEP1GSC199_0501	LEP1GSC203_0991	LEP1GSC017_0554
2272	NO_HK	NT03LI2383	LEP1GSC049_1994	LEP1GSC059_1954	LEP1GSC193_4223	LEP1GSC086_0386	LEP1GSC062_1456	LEP1GSC103_1473	LEP1GSC048_3647	LEP1GSC052_1613	LEP1GSC058_0755	LEP1GSC050_0924	LEP1GSC061_0301	LEP1GSC185_2599	LEP1GSC047_2637	LEP1GSC195_1019	LEP1GSC202_3422	NT05LB2140	LEP1GSC199_2281	LEP1GSC203_1179	LEP1GSC017_3892
2273	NO_RR	NT03LI2384	LEP1GSC049_1993	LEP1GSC059_1953	LEP1GSC193_4224	LEP1GSC086_0387	LEP1GSC062_1455	LEP1GSC103_1472	LEP1GSC048_3648	LEP1GSC052_1614	LEP1GSC058_0756	LEP1GSC050_0923	LEP1GSC061_0300	LEP1GSC185_2598	LEP1GSC047_2638	LEP1GSC195_1018	LEP1GSC202_3423	NT05LB2141	LEP1GSC199_2282	LEP1GSC203_1178	LEP1GSC017_3893
2680	O_RR	NT03LI2797	LEP1GSC049_0268	LEP1GSC059_2796	LEP1GSC193_1380	LEP1GSC086_4368	LEP1GSC062_0784	LEP1GSC103_1088	LEP1GSC048_3907	LEP1GSC052_2033	LEP1GSC058_1278	LEP1GSC050_2240	LEP1GSC061_0703	LEP1GSC185_0248	LEP1GSC047_2384	LEP1GSC195_0136	LEP1GSC202_2491	NT05LB2443	LEP1GSC199_1364	LEP1GSC203_0924	LEP1GSC017_0624
2681	O_RR	NT03LI2798	LEP1GSC049_0267	LEP1GSC059_2797	LEP1GSC193_1379	LEP1GSC086_4369	LEP1GSC062_0783	LEP1GSC103_1087	LEP1GSC048_3908	LEP1GSC052_2034	LEP1GSC058_1279	LEP1GSC050_2241	LEP1GSC061_0704	LEP1GSC185_0249	LEP1GSC047_2383	LEP1GSC195_0137	LEP1GSC202_2492	NT05LB2444	LEP1GSC199_1365	LEP1GSC203_0923	LEP1GSC017_0625
2682	Hpt	NT03LI2799	LEP1GSC049_0266	LEP1GSC059_2798	LEP1GSC193_1378	LEP1GSC086_4370	LEP1GSC062_0781	LEP1GSC103_1086	LEP1GSC048_3909	LEP1GSC052_2035	LEP1GSC058_1280	LEP1GSC050_2242	LEP1GSC061_0705	LEP1GSC185_0250	LEP1GSC047_2382	LEP1GSC195_0138	LEP1GSC202_2493	NT05LB2445	LEP1GSC199_1366	LEP1GSC203_0922	LEP1GSC017_0626
3409	Hyb	NT03LI3563	LEP1GSC049_3524	LEP1GSC059_0418	LEP1GSC193_3620	LEP1GSC086_3519	LEP1GSC062_1683	LEP1GSC103_3233	LEP1GSC048_0478	LEP1GSC052_3015	LEP1GSC058_2768	LEP1GSC050_2714	LEP1GSC061_3431	LEP1GSC185_1854	LEP1GSC047_3674	LEP1GSC195_3229	LEP1GSC202_1199	NT05LB0078	LEP1GSC199_3403	LEP1GSC203_3214	LEP1GSC017_1831
3410	O_HK	NT03LI3564	LEP1GSC049_3525	LEP1GSC059_0419	LEP1GSC193_3621	LEP1GSC086_3518	LEP1GSC062_1682	LEP1GSC103_3232	LEP1GSC048_0477	LEP1GSC052_3014	LEP1GSC058_2767	LEP1GSC050_2713	LEP1GSC061_3432	LEP1GSC185_1855	LEP1GSC047_3673	LEP1GSC195_3228	LEP1GSC202_1200	NT05LB0079	LEP1GSC199_3404	LEP1GSC203_3213	LEP1GSC017_1832
3588	NO_RR	NT03LI3751	LEP1GSC049_3975	LEP1GSC059_4180	LEP1GSC193_3308	LEP1GSC086_2183	LEP1GSC062_2472	LEP1GSC103_2706	LEP1GSC048_2287	LEP1GSC052_3798	LEP1GSC058_3186	LEP1GSC050_3169	LEP1GSC061_3054	LEP1GSC185_1087	LEP1GSC047_1629	LEP1GSC195_3561	LEP1GSC202_0873	NT05LB3299	LEP1GSC199_3039	LEP1GSC203_3528	LEP1GSC017_1495
3590	NO_HK	NT03LI3752	LEP1GSC049_3974	LEP1GSC059_4179	LEP1GSC193_3309	LEP1GSC086_2184	LEP1GSC062_2471	LEP1GSC103_2705	LEP1GSC048_2286	LEP1GSC052_3797	LEP1GSC058_3187	LEP1GSC050_3170	LEP1GSC061_3053	LEP1GSC185_1088	LEP1GSC047_1628	LEP1GSC195_3560	LEP1GSC202_0875	NT05LB3300	LEP1GSC199_3040	LEP1GSC203_3527	LEP1GSC017_1496
