# Supplementary material for: What Makes a Bacterial Species Pathogenic?:Comparative Genomic Analysis of the Genus Leptospira
Source: PLoS Negl Trop Dis. 2016 Feb 18;10(2):e0004403. doi: 10.1371/journal.pntd.0004403 (PMC4758666; doi:10.1371/journal.pntd.0004403)
Supplement: S16 Table — (XLSX) [file pntd.0004403.s023.xlsx]

## Sheet: pathogens_only_TCS_clusters_ALL
S16 Table. Two component systems specific for pathogenic Leptospira spp
Cluster ID	TCS Category	L. interrogans sv. Copenhageni str. Fiocruz L1-130	L. kirschneri sv. Cynopteri str. 3522 CT	L. noguchii sv. Panama str. CZ 214T	L. alstoni sv. Pingchang str. 80-412	L. weilii sv. undetermined str. LNT 1234	L. alexanderi sv. Manhao str. 3 L 60T	L. borgpetersenii sv. Javanica str. UI 09931	L. santarosai sv. Shermani str. 1342KT	L. kmetyi sv. Malaysia str. Bejo-Iso9T
1858	Hyb	NT03LI1954	LEP1GSC049_2258	LEP1GSC059_2285	LEP1GSC193_1996	LEP1GSC086_0170	LEP1GSC062_3755	LEP1GSC103_3378	LEP1GSC048_3118	LEP1GSC052_1251
1859	Hyb	NT03LI1955	LEP1GSC049_2261	LEP1GSC059_2284	LEP1GSC193_1997	LEP1GSC086_0171	LEP1GSC062_3754	LEP1GSC103_3379	LEP1GSC048_3119	LEP1GSC052_1252
2259	NO_HK	NT03LI2370	LEP1GSC049_2003	LEP1GSC059_3308	LEP1GSC193_4214	LEP1GSC086_0374	LEP1GSC062_1475	LEP1GSC103_1481	LEP1GSC048_3637	LEP1GSC052_1606
2260	NO_RR	NT03LI2371	LEP1GSC049_2002	LEP1GSC059_3309	LEP1GSC193_4215	LEP1GSC086_0375	LEP1GSC062_1474	LEP1GSC103_1480	LEP1GSC048_3638	LEP1GSC052_1607
2403	O_HK	NT03LI2516	LEP1GSC049_1868	LEP1GSC059_1815	LEP1GSC193_4364	LEP1GSC086_4050	LEP1GSC062_1301	LEP1GSC103_1333	LEP1GSC048_3769	LEP1GSC052_1717
2597	O_RR	NT03LI2712	LEP1GSC049_0335	LEP1GSC059_2715	LEP1GSC193_0110	LEP1GSC086_0516	LEP1GSC062_0348	LEP1GSC103_1979	LEP1GSC048_0694	LEP1GSC052_2142
3497	Hyb	NT03LI3658	LEP1GSC049_4063	LEP1GSC059_4273	LEP1GSC193_3225	LEP1GSC086_4477	LEP1GSC062_3853	LEP1GSC103_2812	LEP1GSC048_1841	LEP1GSC052_3250
